# Goal-dependent tuning of muscle spindle receptors during movement preparation

by

Stylios Papaioannou & Michael Dimitriou\*

**Affiliation:** Physiology Section  
Department of Integrative Medical Biology  
University of Umeå  
S-901 87 Umeå  
Sweden

**Corresponding author:** Dr. Michael Dimitriou  
Email: [mdimitriou@umu.se](mailto:mdimitriou@umu.se)  
Phone: +46-90-786-5186

**Figures:** 7 Main & 5 Supplementary

**Word counts:** Abstract: 149  
Introduction: 474  
Results: 2667  
Discussion: 2056  
Methods: 3927

**Abbreviated title:** Movement preparation tunes muscle spindles

## Abstract

1 Voluntary movements are believed to be advantageously prepared before they are executed, but  
2 the neural mechanisms at work have been unclear. For example, there are no overt changes in  
3 skeletal muscle activity due to movement preparation. Here, using a delayed-reach manual task,  
4 we demonstrate a decrease in the firing rate of human muscle afferents (primary spindles) when  
5 preparing stretch rather than shortening of the spindle-bearing muscle. In two additional  
6 experiments, arm perturbations during reach preparation revealed a congruent decrease of  
7 stretch reflex gains, including at spinal latencies for shoulder muscles that are not strongly pre-  
8 loaded. Our study shows that movement preparation can involve sensory elements of the  
9 peripheral nervous system. This goal-dependent tuning of antagonist proprioceptors may benefit  
10 voluntary movement through stretch reflex modulation. We suggest that central preparatory  
11 activity can also reflect sensory control, and preparatory tuning of muscle spindle  
12 mechanoreceptors is a component of planned reaching movements.

## Introduction

13  
14 A key mission in sensorimotor neuroscience is to understand the function and consequence of  
15 “preparatory activity”, that is, the vigorous changes in neural activity that occur in multiple areas  
16 of the brain before onset of a voluntary reaching movement. Although the firing of such  
17 ‘preparatory’ neurons located in e.g., the premotor cortex has been linked to a variety of factors  
18 such as movement direction/extent<sup>1,2</sup> and visual target location<sup>3</sup>, the specific function of  
19 preparatory activity has remained unclear. A previous claim that preparatory activity represents a  
20 subthreshold version of movement-related cortical activity<sup>4</sup> has been contradicted more recently  
21 in support of the notion that preparation sets another initial dynamical state that promotes  
22 execution of the planned movement<sup>5,6</sup>. But it is unclear what this initial state actually entails and  
23 by which neural mechanisms exactly the benefits of movement preparation are realized. For  
24 example, although preparation benefits performance by lowering reaction time<sup>7-9</sup>, with longer  
25 preparation delays generally leading to better movement quality<sup>10</sup>, there are no overt changes in  
26 skeletal muscle activity during movement preparation. Moreover, recent behavioral findings  
27 indicate that movement preparation is mechanistically independent from movement initiation,  
28 with a distinct neural basis<sup>11</sup>.

29 Little attention has been placed thus far on the possibility that preparatory activity may also  
30 reflect control of sensory (i.e., proprioceptive) elements located in the peripheral nervous system.  
31 The aim of the current study was to investigate the impact of goal-directed movement  
32 preparation on muscle spindle output and assess any implications for ‘reflex’ motor responses.  
33 Independent modulation of spindle sensitivity/gain to dynamic muscle stretch (via the  $\gamma$  motor or  
34 ‘fusimotor’ system) could function as movement-related preparation that does not determine  
35 concurrent skeletal muscle activity, but can nevertheless affect the execution of movement  
36 through influencing Stretch Reflex (SR) responses of all latencies. In other words, we  
37 hypothesize that preparatory activity in the brain may also underlie goal-appropriate patterns of  
38 antagonist engagement, by selectively modulating spindle output and negative feedback (i.e.,  
39 mechanical resistance) of stretching muscles during planned reaching movements.

40 In what follows we describe positive findings generated by three independent but complementary  
41 experiments, each employing a different group of human participants. One experiment focused  
42 on recording muscle afferent activity from hand and digit actuators using microneurography  
43 (experiment ‘1’), and the other two experiments utilized a robotic manipulandum platform to study  
44 ‘reflex’ motor responses at the level of the whole arm (experiments ‘2’ & ‘3’). To our knowledge,  
45 experiment ‘1’ represents the first instance where muscle afferent activity was recorded in a  
46 context involving both movement preparation and active reaching. Recording from single muscle  
47 afferents rather than single fusimotor efferents is feasible but also preferable in our paradigm  
48 involving fully-alert active humans. That is, the result of any substantial change in  $\gamma$  activity is a  
49 change in the output of the muscle spindle, and the spindle organ acts as an integrator of input  
50 from multiple fusimotor fibers<sup>12</sup>.

51

## Results

52 In experiment ‘1’, participants performed a classic center-out reaching task with the right hand  
53 while we simultaneously recorded hand kinematics, relevant electromyography (EMG) signals  
54 and single afferent activity from wrist or digit extensor muscles (Fig. 1a). Hand movements  
55 controlled the 2D position of a cursor on a monitor, and the participant’s task was to move the  
56 cursor to reach one of eight peripheral visual targets. The targets/trials were presented in a  
57 block-randomized manner, hence there was no systematic difference in kinematic history across

58 a particular group of targets. On each trial, a target would suddenly turn into a red filled circle,  
59 representing the target 'cue', and participants were instructed to move to this target as soon as  
60 the 'Go' cue appeared (target turned into a green outline). The participants could 'fail' a trial if  
61 they were too late in reaching the target (see Methods for more details). Recording from single  
62 afferents during naturalistic active movement is very challenging due to the high incidence of  
63 electrode dislocations, and noise in the afferent signal also increases with muscle tension.  
64 Therefore, the delayed-reach task was designed to be short and compact, concentrating on one  
65 albeit fundamental experimental manipulation: visual target location. Figure 1b-c presents  
66 exemplary single-trial data pertaining to the same primary spindle afferent (type 'la' afferent).  
67 Despite no overtly meaningful changes in kinematic variables or EMG during movement  
68 preparation, there was a decrease in the afferent's firing rate when preparing to reach a target  
69 that required stretch of the spindle-bearing muscle (Fig. 1b). However, no such decrease  
70 occurred when preparing to move in the opposite direction that required shortening the muscle  
71 (Fig. 1c).

72 From each participant in experiment '1', we recorded muscle afferent activity from one of three  
73 muscles: the radial wrist extensor ('*extensor carpi radialis*'), the ulna wrist extensor (*extensor*  
74 *carpi ulnaris*) or the common digit extensor (*extensor digitorum communis*). All single trials were  
75 categorized according to whether reaching the cued target required a substantial stretch or  
76 shortening of the spindle-bearing muscle (Fig. 2a). Despite no overt movement during the  
77 'preparatory period' i.e., the period between onset of the target cue and onset of the 'Go' cue  
78 (Fig. 2b; top panel), type Ia population responses decreased when preparing to reach targets  
79 associated with stretch (vs. shortening) of the spindle-bearing muscle, relative to baseline (the  
80 latter is defined as values in the 0.5 sec epoch prior to target onset). The suppression effect  
81 appeared ~80 ms after onset of the target cue and generally seemed to intensify closer to the  
82 onset of the 'Go' cue (Fig. 2b). This firing pattern could be seen at the level of single afferent  
83 spike-trains (Fig. 1b) and in all 8 recorded type Ia afferents (Fig. 2c), including those from digit  
84 extensor muscles that also stretch by wrist flexion. Single-sample t-tests confirmed the range of  
85 confidence intervals plotted in Figure 2c. Type Ia firing rates in all three epochs pertaining to  
86 subsequent muscle stretch (purple) were significantly different from baseline (epoch '1':  $t(7)=-3.3$ ,  
87  $p=0.013$ ; epoch '2':  $t(7)=-3.1$ ,  $p=0.017$ ; epoch '3':  $t(7)=-5.4$ ,  $p=0.001$ ), but this was not the case  
88 for targets associated with subsequent muscle shortening ('blue'; all  $p>0.33$ ). Indeed, a repeated

89 measures ANOVA of the design 2 (target direction) x 3 (epoch) showed a main effect of target  
90 direction on Ia firing rates ('stretch' < 'shortening' targets) with  $F(1, 7)=10.8$ ,  $p=0.013$  and  
91  $\eta_p^2=0.6$ , but the main effect and interaction involving the 'epoch' condition were not significant  
92 ( $p>0.1$ ). However, complementary planned comparison tests confirmed the differences across  
93 confidence intervals displayed in Figure 2c. That is, when preparing to reach targets associated  
94 with muscle stretch, firing rates were lower in epoch '3' vs. epoch '1' with  $F(1, 7)=10.5$  and  
95  $p=0.014$ , but there was no significant difference in firing rate between epoch '2' and '3' ( $p=0.08$ ).  
96 The results demonstrate that type Ia responses started to decrease early-on when preparing a  
97 movement that would stretch the spindle-bearing muscle, and this proprioceptive suppression  
98 intensified close to the onset of the 'Go' cue.

99 As expected, kinematic and surface EMG signals showed no overtly meaningful variation in the  
100 preparatory period as a function of target cue. In certain cases, such as in the de-efferented  
101 spindles of the anaesthetized cat<sup>13</sup>, very small deviations in muscle length have been shown to  
102 impact spindle responses to stretch. Whether or not equivalently small deviations in hand  
103 kinematics could affect spindle responses in our paradigm, we had no reason to expect any  
104 systematic differences in kinematic variability during movement preparation with regard to the  
105 two groups of visual targets (Fig. 2a). Indeed, as reflected in Supplementary Figure 2, t-tests  
106 indicated no significant deviations from baseline during preparation for spindle-bearing muscle  
107 length (all  $p>0.36$ ), velocity (all  $p>0.28$ ), acceleration (all  $p>0.19$ ) or EMG (all  $p>0.14$ ), and no  
108 variable showed a trend or tendency towards the suppression pattern seen in spindle Ia  
109 responses prior to muscle stretch (i.e., purple epoch '3' < purple epoch '1' in Figure 2c).

110 We also recorded from four secondary spindle afferents (type 'II') and three Golgi tendon organ  
111 afferents (type 'Ib' encoding muscle-tendon tension) during the delayed-reach task. The same t-  
112 test analyses as above indicated no difference from baseline in type II firing rates (all  $p>0.36$ ;  
113 Supplementary Fig. 3a), with no tendency towards the suppression pattern seen in spindle Ia  
114 responses. As all recorded type Ia afferents exhibited the goal-dependent suppression (Fig. 2c),  
115 and no consistent modulation was observed in type 'II' afferents, this suggests that a goal-  
116 dependent decrease in dynamic  $\gamma$  motor activity occurred when preparing to stretch the spindle-  
117 bearing muscle. These 'dynamic' fusimotor neurons only affect primary spindle receptors and, if  
118 everything else is equal (e.g., no movement), a substantive decrease in dynamic fusimotor

119 output is known to induce some decrease in background (tonic) firing of type Ia afferents<sup>14</sup> as  
120 shown in Fig. 2b-c. However, dynamic fusimotor supply has a much stronger effect on the gain of  
121 spindle output to dynamic muscle stretch<sup>12,14</sup>. A lowered spindle gain for stretching antagonists  
122 represents a degree of 'on-line' sensory attenuation of own action, and this proprioceptive  
123 suppression could also diminish counteractive motor feedback responses at all latencies.  
124 Interestingly, there also seemed to be a universal increase in type Ib firing rates regardless of  
125 target group (Supplementary Fig. 3b), and this did not parallel the state of the relevant parent  
126 EMG (Supplementary Fig. 3c). Although single-sample t-tests showed no difference from  
127 baseline in type Ib responses (all  $p > 0.09$ ), a 2 (target group) x 3 (epoch) repeated-measures  
128 ANOVA yielded a main effect of target group ( $F(1, 2) = 21$ ,  $p = 0.044$  and  $\eta_p^2 = 0.9$ ), indicating that  
129 the increases in Ib firing rate were larger for shortening targets. There was no significant effect of  
130 epoch or interaction effect between target group and epoch ( $p > 0.21$ ). Because Golgi tendon  
131 organs and their respective Ib afferents are responsive to force produced by muscle fibers, this  
132 would appear to contradict the widely held belief of no changes in skeletal muscle activity during  
133 movement preparation; this universal increase in Golgi responses needs to be further confirmed  
134 by recording from a larger group of type Ib afferents. However, even if the type Ib effect is shown  
135 to be robust, it does not contradict the hypothesis that goal-dependent decreases in type Ia firing  
136 are due to suppression of  $\gamma$  neurons that are controlled independently of  $\alpha$  motor neurons. Type  
137 Ib firing rates are unlikely to represent spindle state as intrafusal muscle fibers are known to  
138 make negligible contributions to muscle force<sup>15</sup>. Most important, however, the direction of the Ib  
139 effect (increase) is the same for both visual target groups (i.e., see purple and blue epoch '3';  
140 Supplementary Fig. 3b), indicating that a different mechanism was at play here than the one  
141 controlling primary spindles. In other words, if the mechanism or underlying mechanical state  
142 responsible for modulating type Ib responses was also the one shaping type Ia responses, one  
143 would expect a larger suppression of type Ia activity for shortening targets, which was not the  
144 case (e.g., 'blue' in Fig. 2c). In addition, if the above were true, some systematic effect in type II  
145 afferent responses would also occur but none was found (Supplementary Fig. 3a).

146 Subsequent analyses also suggest an attenuation of dynamic  $\gamma$  influence on antagonist muscle  
147 spindles in delayed reach. As mentioned above, dynamic fusimotor activity has a weaker positive  
148 effect on tonic type Ia responses ('offset') and a much stronger positive effect on the spindle's  
149 sensitivity to dynamic muscle stretch ('gain'). Factors potentially shaping muscle spindle

150 responses during active movement include spindle-bearing muscle length, velocity, acceleration  
151 and EMG, the latter used as a proxy for any ‘alpha-gamma co-activation’<sup>16-18</sup>. A forward stepwise  
152 regression indicated that only velocity and acceleration exerted a significant impact on type Ia  
153 population responses during reaching (Fig. 3a-b), with standardized beta coefficient=0.44 and  
154  $p < 10^{-5}$  for velocity, and beta=0.21 and  $p = 0.025$  for acceleration ( $R^2 = 0.72$ ,  $p < 10^{-5}$ ). As expected,  
155 there was a significant relationship between velocity and empirical type Ia firing rates (Fig. 3d),  
156 with  $r = 0.84$  and  $p < 10^{-5}$ , but there was no significant one-to-one relationship between acceleration  
157 and firing rates ( $r = 0.24$ ,  $p = 0.32$ ). That is, spindles were unable to unambiguously ‘encode’  
158 acceleration (Fig. 3f). Conducting equivalent analyses with type Ia firing rates from the radial  
159 wrist extensor muscle alone produced congruent results (Fig. 3c): only velocity and acceleration  
160 had a significant impact with beta=0.53 with  $p < 10^{-5}$  for velocity, and beta=0.25 with  $p = 0.01$  for  
161 acceleration ( $R^2 = 0.79$ ,  $p < 10^{-5}$ ). Similarly, the muscle’s Ia firing rate had a significant relationship  
162 with velocity but not with acceleration (Fig. 3e & 3g). The above findings contrast with those  
163 where hand reaching movements are performed without a preparatory delay. Specifically, in  
164 ‘unprepared’ manual reaching, the relative impact of acceleration on Ia responses from the radial  
165 wrist extensor is about twice as large (i.e., beta > 0.5) and greater than that of velocity, with a  
166 significant direct relationship existing between acceleration and Ia firing rate<sup>17</sup>.

167 As mentioned above, changes in tonic Ia firing during movement preparation are presumed to be  
168 -at least partly- indicative of dynamic fusimotor activity levels. If the system sought to  
169 systematically attenuate fusimotor outflow to antagonist muscles, this implies that suppression of  
170 spindle output from stretching antagonists is beneficial for reaching performance. We show that a  
171 likely consequence of fusimotor attenuation is the decrease in spindle sensitivity to acceleration.  
172 But some sensitivity to acceleration clearly remained at the population level (Fig. 3b-c), in turn  
173 suggesting possible individual differences in the control of spindle sensors with implications for  
174 task performance. It is known that movement preparation benefits performance by lowering  
175 reaction time<sup>7-9</sup>, with a positive relationship existing between preparation delay length and  
176 movement quality<sup>10</sup>. Interestingly, although we found no relationship between type Ia firing rates  
177 observed during late preparation (i.e., epoch ‘3’) and reaction time (Fig. 4a-b), there was a strong  
178 relationship between wrist type Ia responses at epoch ‘3’ and time to peak velocity during reach,  
179 with  $r = 0.9$  and  $p = 0.035$ . (Fig. 4c). Every unit increase in firing rate during preparation involved an  
180 additional 3 ms delay in reaching peak velocity; that is, the regression coefficient was 3. We

181 found no equivalent relationship between this performance measure and kinematic variables or  
182 EMG (Supplementary Fig. 4). The relationship between time to peak velocity and Ia firing levels  
183 at late preparation seemed to extend beyond muscles that powered movement in the reaching  
184 task. For all but one afferent from digit extensors, the same relationship was found between type  
185 Ia firing rates and time to peak velocity ( $r=0.91$ ,  $p=0.004$ , 'b' coefficient=0.301; Fig. 4d). Note that  
186 digit extensors can also affect execution of hand flexion via spinal and transcortical negative  
187 feedback circuits (e.g., spinal SR).

188 Indeed, muscle spindles play a central role in SR responses. A substantial goal-dependent  
189 suppression of spindle gains could lead to equivalent changes in negative feedback gains. In  
190 order to test this prediction of experiment '1', we used a popular methodological approach for  
191 assessing SR function at the level of the whole upper limb. Namely, in experiment '2',  
192 participants performed a version of the delayed-reach task by holding the graspable end of a  
193 robotic manipulandum with their right hand. They started each trial by bringing the hand at a  
194 central target ('origin'; see Fig. 5a). The hand could then be slowly loaded in either the upper-left  
195 ( $135^\circ$ ) or lower-right direction ( $315^\circ$ ), or there could be no load. One of two possible targets  
196 would then be cued by turning red, and after either a 'long' or relatively 'short' preparatory delay  
197 (see Methods for more details) the hand would be perturbed in the same or opposite direction as  
198 the target i.e., either in the  $135^\circ$  or  $315^\circ$  direction (Fig. 5b). Importantly, even when perturbations  
199 were in the direction of the cued target, participants had to complete the planned movement  
200 themselves as the size of the perturbation was only about a third of the distance to the target.  
201 This ensured that movement control was required on every trial of this task, regardless of  
202 perturbation direction. Figure 5c-e displays the median responses of a representative participant.  
203 Despite identical displacement during the haptic perturbations, visual inspection of the EMG  
204 signal from the unloaded pectoralis indicates a clear difference at spinal SR latencies as a  
205 function of cued target (i.e., 25-50 ms following perturbation onset; Fig. 5c). This difference is  
206 congruent with the afferent findings: a relative suppression of the spinal SR response when  
207 preparing to stretch the pectoralis (purple) rather than shorten it (blue). This relative suppression  
208 completely disappeared at high background activation levels of the pectoralis, induced by an  
209 external load applied prior to the haptic perturbation (Fig. 5e).



210 Figure 6a-c represents the equivalent to Figure 5c-e for all participants. The same trends can be  
211 seen in continuous EMG signals, that is, a goal-dependent suppression of pectoralis SR,  
212 including at spinal monosynaptic latencies. To concentrate on the effect of cued target while  
213 accounting for known effects, such as the universal increase in spinal SR magnitude that  
214 accompanies muscle loading<sup>19-21</sup>, the EMG signals for each muscle, load condition and delay  
215 condition were contrasted (subtracted) as a function of target cue. This effectively isolated any  
216 effect of target cue on muscle EMG. Note that in experiment '2' and '3' we only analyzed EMG  
217 signals from stretching muscles (i.e., particular pairs of muscle and perturbation direction) in  
218 order to concentrate on SR responses. When the preparation delay was long (Fig. 6d), single-  
219 sample t-tests indicated a significant suppression of pectoralis spinal SR when preparing stretch  
220 in the unloaded condition ( $t(13)=-3.5$ ,  $p=0.004$ ) and the no-load condition ( $t(13)=-2.5$ ,  $p=0.025$ ),  
221 but there was no relative suppression as a function of target cue when the muscle was externally  
222 loaded ( $t(13)=-0.23$ ,  $p=0.82$ ). Interestingly, when the preparation delay was 'short' (Fig. 6e-h),  
223 there was no suppression of spinal SRs when the muscle was loaded or unloaded ( $p>0.8$  for  
224 both) but there was a small suppression effect in the no-load condition, with  $t(13)=-0.25$ ,  
225  $p=0.025$ . A congruent pattern of effects was observed for the posterior deltoid EMG  
226 (Supplementary Fig. 5). Specifically, when the preparation delay was long, there was a  
227 significant suppression of deltoid EMG when the muscle was unloaded ( $t(13)=-3.7$ ,  $p=0.002$ ).  
228 There was also significant suppression of spinal SR in the no-load condition when the delay was  
229 short ( $t(13)=-3.3$ ,  $p=0.006$ ).

230 A third experiment implicating a larger number of visual targets produced equivalent results for  
231 the pectoralis muscle (i.e., experiment '3'; Fig. 7). When the preparation delay was relatively long  
232 (Fig. 7a-c), there was suppression of the spinal SR of the unloaded pectoralis for 'stretch' targets,  
233 with  $t(9)=-3.7$ ,  $p=0.005$  (Fig. 7d). Although for most participants the spinal SR was suppressed in  
234 the no-load condition as well (middle column in Fig. 7d), the overall difference was deemed not  
235 significant ( $p=0.19$ ; note the one deviant value  $>0$ ). Interestingly, as in experiment '2,' there was  
236 a small but significant suppression of spinal SR in the no-load condition when the delay was  
237 short (Fig. 7e-h), with  $t(9)=-2.5$ ,  $p=0.037$ . In both experiment '2' and '3', the recorded muscles  
238 including the pectoralis and deltoid muscles displayed long-latency SR responses that were  
239 clearly goal-dependent (i.e., EMG 71-100 ms; see Fig. 6-7); that longer-latency SR responses  
240 are goal-dependent and influenced by proprioceptive feedback is already well-established<sup>22-25</sup>.

## Discussion

241

242 The current results indicate a novel and specific role for preparatory activity in proprioceptive  
243 tuning with implications for stretch 'reflex' behavior. That is, the sensorimotor control of  
244 antagonist muscles also emerges as a potential function of movement preparation. We found a  
245 link between spindle afferent responses and a measure of individual performance during  
246 reaching (Fig. 4c-d) but no relationship between afferent responses and reaction time (Fig. 4a-b).  
247 Both reaction time and movement quality can benefit from preparation<sup>7-10</sup> but the two may rely on  
248 different neural mechanisms<sup>11</sup>, with the latter perhaps depending heavily on proprioceptive tuning  
249 of antagonists than on agonist control. Nevertheless, our main findings are congruent with classic  
250 results concerning preparatory activity in the CNS and its two hallmarks which are (a) that  
251 preparatory activity should not overtly affect concurrent skeletal muscle activity and, (b)  
252 preparatory activity needs to somehow promote or facilitate the planned movement. Moreover,  
253 the current study helps bridge the gap between traditional views where preparatory activity is  
254 seen as representing specific movement parameters<sup>1-4</sup>, and the more recent claims that  
255 movement preparation shapes an initial state of a dynamical system whose evolution produces  
256 the planned movement<sup>5,6</sup>. We show that such an 'initial' state may partly pertain to the state of  
257 the peripheral proprioceptive apparatus, which can predispose the system for sensory  
258 attenuation and SR suppression of muscles that will stretch during the desired voluntary  
259 movement. One can speculate that failure to properly engage this mechanism may contribute to  
260 target undershoot ('dysmetria') and perhaps spasticity.

261 The current study is the first to record muscle afferent responses during movement preparation  
262 (i.e., over a dedicated delay period) in a context where voluntary reaching movements were  
263 actually made. One other study<sup>26</sup> implicating the upper limb looked at spindle responses when  
264 anticipating the need to make a contraction that would oppose an expected external perturbation.  
265 No preparatory effects were found but we believe our paradigm better reflects the state of affairs  
266 when reaching in every-day life, as the task combined true reaching intention and action. There  
267 has also been strong evidence of preparatory activity in spinal interneurons<sup>27,28</sup>, but our study is  
268 the first to document preparatory changes in sensory elements of the peripheral nervous system.  
269 Although the central origin of fusimotor control could not be isolated by the current paradigm,  
270 some clues are offered. Preparatory activity in the cortex can appear in as little as 50 ms

271 following onset of the target cue<sup>6,29</sup> and activity of corticospinal neurons can be suppressed  
272 during movement preparation<sup>30</sup>. The spindle suppression effect seems to begin early, at ~80  
273 msec after the target cue and the general profile of the ensuing Ia signals suggests an early and  
274 a later phase to this process (Fig. 2b-c). This may in turn reflect two different sources of  
275 fusimotor control, an early subcortical one (e.g., brainstem<sup>31-33</sup>) and a later cortical one. Indeed,  
276 two general patterns of SR behavior emerged in our study based on the duration of the  
277 preparatory delay. When the preparatory delay was relatively long, goal-dependent spinal SR  
278 responses appeared if the muscle was not strongly pre-loaded. But for trials where the  
279 preparatory delay was short, there was a small but consistent goal-dependent suppression when  
280 there was no external load in any direction (e.g., Fig. 6h, Fig. 7h, and Supplementary Fig. 5h). It  
281 is possible that the larger spindle and SR suppression associated with longer preparatory delays  
282 depends on slower but more potent cortical circuits that are able to account for the presence of  
283 external loads. In contrast, the faster but weaker suppression effect may be of subcortical origin,  
284 unable to deal with external loads. Note that the external loads involved a slow rise (0.8 sec) and  
285 subsequent hold period of 1.2 sec before target cue onset.

286 The general expectation of no specific role for spindle receptors during movement preparation  
287 has been formulated indirectly, through behavioral studies examining SR responses in surface  
288 EMG from the upper limb. Although there has been some evidence of goal-dependent  
289 modulation in spinal SR reflexes, both at the level of digits<sup>34</sup> and at more proximal areas<sup>35</sup>,  
290 previous studies at the level of the digits and more recent studies using robotic platforms to  
291 assess SR responses of more proximal muscles have not identified goal-dependent spinal SR  
292 responses; but such responses are consistently found at transcortical SR latencies<sup>22</sup>. The results  
293 of experiments '2' and '3' suggest that, given a particular experimental design, goal-dependent  
294 modulation of spinal SRs can be consistently induced (Figs. 6-7 & Supplementary Fig. 5). Two  
295 important elements of our experimental design are the systematic manipulation of background  
296 load and ensuring that movement control is required on every trial. Regarding the first, many  
297 previous studies either did not account for the background activation levels of muscles or  
298 deliberately pre-loaded muscles to ensure detectable levels of surface EMG in the spinal SR  
299 epoch. We show that strongly loading a muscle can potentially obscure evidence of goal-  
300 dependent proprioceptive tuning (e.g., Fig. 6a-c). That is, our results show that load-related or  
301 "automatic" gain-scaling<sup>19-21</sup> of spinal SRs for the purposes of postural control may compete or

302 otherwise interfere with target-dependent tuning of spinal SRs. But muscle spindle gains  
303 -modified by independent  $\gamma$  control- are not necessarily affected by background mechanical  
304 loading. Indeed, when imposing stretch of the isometrically loaded radial wrist extensor, no clear  
305 net difference in spindle sensitivity is found, as an approximately equal number of 'dynamic' and  
306 'static' fusimotor effects appear with these two having opposite effects on spindle gain<sup>36</sup>. A likely  
307 reason for the apparent saturation of spinal SR responses in loaded muscles is the stronger top-  
308 down excitation of  $\alpha$  motor neurons. Even if spindle gains remain suppressed (but not fully) when  
309 about to stretch a loaded muscle, the high excitability levels of  $\alpha$  motor neurons can still lead to  
310 large spinal SR responses, obscuring any goal-dependent tuning of muscle spindles (i.e., ceiling  
311 effect; but the opposite extreme is also problematic, see e.g., Supplementary Fig. 5c). It is well-  
312 known that a component of long latency SR responses is robustly goal-dependent and immune  
313 to automatic gain-scaling<sup>19-21</sup>. In this context, appropriate long latency SR responses can  
314 possibly emerge by linking goal-dependent afferent signals to transcortical feedback  
315 circuits<sup>22,37,38</sup> that are not subject to automatic gain scaling.

316 Nevertheless, low-level activity or a –largely– 'unloaded' initial muscle state can be considered  
317 the norm when reaching in every-day life (i.e., reaching with an empty hand to grasp an object),  
318 such as starting with the arm hanging to the side when standing, or with the flexed arm resting on  
319 a desk. Also note that most type Ia afferents in our study originated from the radial wrist extensor  
320 muscle which displayed low-level tonic motor activity before movement for maintaining the  
321 hand's starting position against gravity (e.g., see Fig. 1b-c). One study that examined the SR  
322 responses of unloaded elbow muscles following perturbations of the lower arm did not find  
323 evidence of goal-dependency at spinal latencies<sup>39</sup>. But their 'IN-OUT' paradigm did not require  
324 participants to engage in movement control during congruent perturbations as the hand was  
325 moved inside the target area early-on by the perturbation itself (i.e., large target area was  
326 adjacent to hand origin). As mentioned above, an important element of our experimental design  
327 was ensuring that movement control was required throughout the task. That is, participants had  
328 to actively complete movement to the target on every trial, including after congruent perturbations  
329 (see e.g., purple velocity profiles in Fig 5c-e). Hence, one such trials the participants were  
330 encouraged to 'facilitate the reach' rather than ignore or 'not resist' a perturbation. That said,  
331 although experiments '2' and '3' were not designed to induce SR responses from elbow muscles  
332 in particular, these were also substantially stretched during perturbations but we only found

333 systematic goal-dependency in spinal SR responses of shoulder muscles. Very recently, it has  
334 been shown that elbow-actuating muscles exhibit spinal SR responses that are tuned to the  
335 position of the hand relative to a single target, rather than the state of the muscles themselves<sup>40</sup>.  
336 Although this does indicate a higher level of sophistication by spinal monosynaptic circuits than  
337 previously thought, the differing SR responses were a function of the different configurations of  
338 the limb, whereas the goal of the task (i.e., location of the target) remained the same across  
339 experimental conditions. The effect of interest was not extended to more proximal areas (i.e.,  
340 shoulder) and instead was thought to represent an anatomically limited mechanism determining  
341 elbow muscle SR responses. Therefore, it may be the case that spinal SR circuits of elbow-  
342 actuating muscles are dominated by a special mode of control, as a function of hand posture.

343 The current findings highlight that muscle spindle receptors and their independent motor system  
344 can serve more decisive and task-dependent roles in sensorimotor control than generally  
345 thought. Traditionally, the spindle organ has been seen as a peripheral mechanoreceptor that  
346 provides reliable information about a muscle's kinematic state. An interesting recent proposition  
347 is that the mechanoreceptive part of spindles responds best to force-related rather than length-  
348 related variables, as shown in passive ('electrically quiescent') muscles<sup>15</sup>. Indeed, when  
349 performing continuous active sinusoidal movements with a single digit in the presence of  
350 assistive or resistive external loads, we have also shown that spindle afferent activity from digit  
351 extensors best encodes a combination of velocity and net external mechanical force<sup>41</sup>. But our  
352 more recent work examining spindle responses in visuomotor learning (i.e., visuomotor rotation)  
353 revealed fundamental changes in spindle output as a function of task stage (e.g., encoding  
354 position vs. velocity in the 'washout' stage), with no fundamental differences in mechanical state  
355 across the task's stages<sup>16</sup>. Besides indicating that the fusimotor system is a specific contributor in  
356 visuomotor learning, the aforementioned study showed that spindle output can be modified  
357 based on changes in the visual environment alone. This is in line with the findings of the current  
358 study (e.g., Fig. 2b-c). Very recent spindle afferent recordings during passive movement of the  
359 foot also indicate that visual feedback can affect spindle output<sup>42</sup>. Accumulating evidence  
360 therefore suggests that human spindles can transcend their traditionally-ascribed role as  
361 mechanoreceptors invariably encoding some muscle state regardless of context or goal. The  
362 traditional account also essentially assumes the purpose of fusimotor control is to ensure the  
363 spindle keeps functioning as a reliable mechanoreceptor, as described by the textbook version of

364 'alpha-gamma co-activation'<sup>43</sup>. In cats, it has been shown that spindles can receive a different  
365 'fusimotor-set'<sup>44</sup> depending on the behavior the animal is engaged in (i.e., primarily variations of  
366 standing or gait in different contexts), but the specific benefit of the different fusimotor sets has  
367 been unclear, and these sets generally seem to reflect the alertness state of the animal. Here,  
368 we show spindle gain modulation as a function of visually-determined goals within the same  
369 behavior (reaching), including evidence of how this spindle tuning can promote motor  
370 performance (e.g., Fig. 4cd, Fig. 6d & 7d).

371 The traditional view of spindles as mundane proprioceptive sensors is the one currently adopted  
372 by prevalent computational frameworks of sensorimotor control<sup>45-49</sup>. Part of these suggest that  
373 our brain predicts the sensory consequences of action and then compares internal predictions  
374 and actual incoming sensory signals ('sensory cancellation'), with no discrepancy between the  
375 two indicating agency of action. With regard to primary muscle spindles in the context of planned  
376 reaching movements, our results suggest that the nervous system does more than these  
377 computational frameworks describe. Presumably still based on internal models and predictions of  
378 future outcomes given an intention or goal<sup>48,49</sup>, the system seems able to proactively choose and  
379 implement a change in sensory feedback gains at source (e.g., Fig. 2-3). That is, in planned  
380 voluntary reach, the 'controller' can proactively modify the 'plant' (i.e., adjust sensitivity of the  
381 plant's sensors) in order to prevent consequences (negative feedback) that would otherwise  
382 interfere with execution of the intended action. Beyond its role in delayed-reach tasks, the  
383 independent and direct control of sensors via  $\gamma$  motor neurons may well constitute an important  
384 overarching third dimension in sensorimotor control, in addition to (i) top-down processes leading  
385 to  $\alpha$  motor neuron control and, (ii) the selective gating and internal processing of incoming  
386 sensory signals. Understanding the full potential and implications of this neglected third  
387 dimension in active behaviors will be a major focus of our future work. By demonstrating  
388 advantageous tuning of spindles in movement preparation, the current study supports the notion  
389 of a 'third way' in which the nervous system can exert goal-dependent sensorimotor control.

390

## Methods

### 391 **Human participants**

392 We recorded afferent activity from 9 adults in the first experiment (mean age of 27 and SD = 3  
393 years; 5 were male), 14 individuals took part in the second experiment utilizing a robotic

394 manipulandum platform (mean age of 24.5 and SD = 4 years; 6 were male), and an additional 10  
395 adults participated in the third experiment utilizing the same platform (mean age = 24 and SD = 4  
396 years; 4 were female). All participants reported having no motor or cognitive disabilities, had  
397 normal or corrected vision, gave their written consent before taking part and were financially  
398 compensated. The current experiments were part of research programs approved by the  
399 Regional Ethics Committee of Umeå and followed the Declaration of Helsinki regarding research  
400 with humans.

## 401 **Experimental setups**

### 402 *Microneurography platform*

403 The participants were seated reclined on an adjustable chair with their right forearm resting on a  
404 cushion. The activity in single afferents from wrist or digit actuator muscles was recorded along  
405 with wrist joint kinematics and EMG activity from relevant forearm muscles (Fig. 1a). Participants  
406 used their right hand in order to perform a classic center-out reaching task, where each target is  
407 first cued before a 'Go' cue to move is issued (the task is described in more detail below). A  
408 clamp proximal to the wrist stabilized the upper arm and helped prevent electrode dislocations,  
409 but hand movements about the wrist were fully unrestrained in this setup. In 'classic' center-out  
410 reaching tasks, target location is normally presented on a monitor and so is the visual feedback  
411 on the location of the hand, represented by a moving cursor. The approach was the same here:  
412 visual feedback was provided by a monitor that was placed across from the participants and  
413 elevated at about their eye-level. They controlled the 2D location of a cursor on the monitor  
414 through wrist movements recorded by a FASTRAK® sensor attached to the dorsal surface of the  
415 hand with double-sided tape. The initial posture of the hand represented a neutral wrist position  
416 which in turn corresponded to the 'origin' position of the cursor (Fig. 1a). In this neutral position,  
417 the hand (e.g., third metacarpal joint) was aligned with the long axis of the forearm, and to hold  
418 this position against gravity the participants had to produce a constant low-level contraction  
419 mainly in the extensor carpi radialis. Wrist radial/ulnar rotations controlled cursor movements in  
420 the vertical visual axis and flexion/extension controlled cursor movements in the horizontal axis  
421 (Fig. 1a). One degree movement at the wrist corresponded to 0.7 cm on-screen movement of the  
422 visual cursor. Visual targets not involved in an ongoing trial were represented as light brown  
423 circle outlines (1.5 cm radius; origin outline had 1 cm radius). The targets were placed

424 symmetrically around the origin in 45° intervals so that movements in all major directions were  
425 induced (Fig. 1a). The distance between the center of the origin and the center of a target was  
426 12°, but a minimum wrist movement of 10° was required for successfully reaching from origin to  
427 target (i.e., edge to edge).

#### 428 *Robotic platform*

429 Here the participants were seated upright on an adjustable chair and their right hand grasped the  
430 handle of a robotic manipulandum (Fig. 5a; KINARM end-point robot, BKIN Technologies, CA).  
431 Although not displayed in Figure 5a, the participant's right forearm was placed inside a thin  
432 cushioning foam structure attached to a custom-made airsled; this structure supported the  
433 participant's forearm and allowed frictionless movement of the arm in a 2D plane. A piece of  
434 leather fabric with Velcro attachments was wrapped tightly around the forearm and hand,  
435 reinforcing the mechanical connection between the airsled, the handle and the hand. This  
436 attachment also fixated the hand so it remained immobile about the wrist and straight (i.e.,  
437 aligned with the forearm) throughout the experiment. The forces exerted by the participant's right  
438 hand were measured by a six-axis force transducer (Mini40-R, ATI Industrial Automation)  
439 embedded in the handle, and the system also generated kinematic data with regard to the  
440 position of the handle. The KINARM also produced controlled forces on the hand, both for the  
441 background (pre-) loading of muscles and for creating position-controlled mechanical  
442 perturbations. Surface EMG was concurrently recorded from seven muscles actuating the right  
443 arm (see the relevant section for more details). Visual feedback was very similar to that  
444 presented in the microneurography experiment, but in the robotic platform visual stimuli were  
445 displayed in the plane of movement by way of a one-way mirror, on which the contents of a  
446 monitor were projected. The participants had no direct vision of their hand (Fig. 5a), but position  
447 of the hand was visually represented by a white dot ('cursor'; 1 cm diameter). Targets not  
448 involved in an ongoing trial were displayed as circle outlines (1.2 cm radius; origin outline had  
449 0.65 cm radius). The targets were placed symmetrically at a distance of 9 cm from the origin.

#### 450 **Specific experimental procedures**

##### 451 *Microneurography – hand movement task*

452 In the behavioral task associated with microneurography, the participants (n=9) were instructed  
453 to place the cursor inside the origin circle and wait there immobile before a trial could start. After



454 a random wait period (0.5 - 2.5 sec), one of the eight different targets would suddenly turn from a  
455 circle outline to a filled red circle of the same size. This indicated which target the participant had  
456 to reach once the 'Go' cue appeared. The 'Go' cue in this case was the red target suddenly  
457 turning into a green outline of the same size. For the majority of the participants (7/9), the time  
458 between onset of the target cue (red circle) and onset of the 'Go' cue was a fixed 1.5 sec  
459 ('preparatory period'). To assess whether any major afferent firing patterns during movement  
460 preparation were critically sensitive to major characteristics of the particular preparatory period,  
461 we used 1 sec as the preparatory period with one participant, and 1.5 sec + random time (1-500  
462 ms) for another. No substantial differences in firing patterns were found between these afferents  
463 and the rest Ia. To aid subsequent analyses, data from the initial 1.5 sec were used in the latter  
464 case, and in the former case the data during the 1 sec periods were resampled offline to 1.5 sec.  
465 In all experiments, the participants were instructed to initiate the reach movement promptly upon  
466 onset of the 'Go' cue and to move at a naturalistic speed. To promote this behavior, participants  
467 received visual feedback on their performance upon reaching a target. That is, they received the  
468 message "Good" if they managed to reach the target within 1 sec following onset of the 'Go' cue  
469 and "Fail" if they took longer. After receiving feedback, the participants returned to the origin to  
470 initiate the next trial. The task continued until the afferent recording was lost due to an accidental  
471 dislocation of the electrode, an all too common occurrence when recording during naturalistically  
472 fast active movement (but at least 24 trials i.e., three blocks of trials were recorded with each  
473 afferent; see below for more details). Trials where movement was initiated prematurely (i.e.,  
474 before the 'Go' cue) were excluded from analyses, but these represented just one trial per  
475 afferent on average, and in no case more than two trials per recorded afferent. To familiarize the  
476 participants with the center-out task and promote good performance at it during  
477 microneurography, they practiced the task for ~10 minutes before microneurography began.

#### 478 *Robotic platform – arm movement tasks*

479 Two experiments were conducted using a robotic platform (experiment '2' and '3'), with each  
480 experiment employing a different set of participants. Before the main task of either experiment,  
481 each participant initially performed a brief unperturbed center-out reaching task that was very  
482 similar to that during microneurography. This introductory task was included in order to establish  
483 a closer link between the behavioral task in microneurography and the main task applied with the  
484 robotic platform (described below). Specifically, in this brief center-out task, participants were

485 instructed to bring the hand in the origin circle and remain there immobile. After a wait period of  
486 one sec + random time (1-500 ms), one of the eight peripheral targets/outlines turned into a filled  
487 red circle of the same size, indicating which target the participant had to reach once the 'Go' cue  
488 appeared ('Go' = target turning green). The 'preparatory period' here was a fixed 1.5 sec, to  
489 match the case during microneurography. Participants had to move at a naturalistic speed and  
490 upon reaching a target they received visual feedback on their performance. Counting from the  
491 onset of the 'Go' cue, the feedback was "Too Slow" if the reach movement lasted >1400 ms,  
492 "Too Fast" if <400 ms, and "Correct" if the movement duration was in-between the two stated  
493 extremes. After receiving feedback, the participants returned to the origin to initiate the next trial.  
494 There were 80 trials in total (i.e., 10 repetitions x 8 targets), presented in a block-randomized  
495 manner, with one set of eight different targets representing a 'block'. The task lasted ~5 minutes.

496 Following a short break of a few minutes, the participants then performed the main behavioral  
497 task. In experiment '2' (e.g., Figs. 5-6), the main task lasted for ~1 hour, whereas in experiment  
498 '3' (e.g., Fig. 7) the task lasted ~1.5 hours. The main task was designed to emphasize reflex  
499 responses from shoulder actuators, allowing the possibility to extend positive findings to the most  
500 proximal areas of the upper limb, although elbow muscle reflexes were also stimulated.  
501 Specifically, visual feedback in the main behavioral task of experiment '2' was the same as in the  
502 brief introductory task described above, except that two rather than eight targets were employed  
503 (Fig. 5a-b) and the cursor position was frozen for the duration of haptic perturbations. Before  
504 each trial begun, the participants brought the hand (i.e., cursor) inside the origin circle. After a  
505 wait of one sec + random time (1-500 ms), the robotic arm was programmed to elicit a slow-rising  
506 4N load (rise-time 800 ms, 1200 ms hold-time) in the front-and-left direction ('135°' direction) or  
507 right-and-back direction ('315°' direction), or no load was applied. A substantial load could  
508 therefore be present at this point in each trial, with the function of pushing towards one or the  
509 other target (Fig. 5a-b). Because the participants were instructed to maintain their hand in the  
510 middle of the origin circle during this phase of the trial, the ultimate purpose of this maneuver was  
511 loading/unloading of the recorded actuators, primarily the posterior deltoid or pectoralis and  
512 anterior deltoid. After an additional 1.2 sec where the full force of the load was countered while  
513 the hand remained still, one of the targets was cued by becoming a red filled circle. After a  
514 preparatory period of either 0.25, 0.75 or 1.25 sec, a position-controlled perturbation of the hand  
515 occurred (3.5 cm displacement, 150 ms rise time, no hold period), swiftly moving the hand

516 towards the middle of one or the other group of targets i.e., in the 135° or 315° direction. The  
517 specific preparatory delays were chosen to match the middle of epochs '1-3', as identified in Fig.  
518 2b-c. The haptic perturbations were designed to induce the kinematics of a fast naturalistic point-  
519 to-point movement (i.e., approximate bell-shaped velocity profile; e.g., see Fig. 5c-e) and  
520 promote stretch reflex responses primarily in shoulder muscles. The robot was allowed to employ  
521 maximum available stiffness (~40,000 N/m) -if necessary- to achieve the desired kinematics on  
522 every trial. The KINARM robot was able to reliably impose the required hand kinematics during  
523 these perturbations regardless of background load/force conditions. When the haptic perturbation  
524 ended (i.e., 150 ms after perturbation onset), the 'Go' cue suddenly appeared and the  
525 participants swiftly reached to this highlighted target. The trial ended when the participants kept  
526 their hand immobile inside the target for 0.3 sec, after which they received visual feedback on  
527 their performance (i.e., "Correct", "Too Fast" or "Too Slow"), as per the brief introductory task.  
528 The participants then returned their hand to the origin to initiate the next trial. Each block of trials  
529 represented one repetition of each level of each condition (i.e., block = 36 trials: 2 targets x 2  
530 perturbation directions x 3 preparatory periods x 3 load conditions) and there were 15 repetitions  
531 of the complete trial block; that is, the total number of trials was 540. The trials were presented in  
532 a block-randomized manner, and therefore all perturbations were unpredictable to the  
533 participants in terms of their timing (onset) and direction. The participants had the opportunity to  
534 take a short break at the end of each block of trials. 'Experiment 3' was essentially the same as  
535 'Experiment 2' except that six targets were used rather than two, and the two preparatory delays  
536 were 0.2 and 1.2 sec, also referred to as 'short' and 'long'. Using six rather than two targets  
537 promoted the sense that each target was either in the same or opposite general direction of the  
538 haptic perturbation. Each block of trials represented one repetition of each level of each condition  
539 (i.e., block = 72 trials: 6 targets x 2 perturbation directions x 2 preparatory periods x 3 load  
540 conditions) and there were 10 repetitions of the complete trial block; that is, the total number of  
541 trials was 720.

#### 542 **Muscle afferent recordings**

543 Single spikes in afferents originating from either the radial wrist extensor (*extensor carpi radialis*),  
544 the ulna wrist extensor (*extensor carpi ulnaris*) or the common digit extensor (*extensor digitorum*  
545 *communis*) were obtained using the technique of microneurography<sup>50</sup>. The radial nerve of the

546 right arm was targeted, and isolated single action potentials were categorized as originating from  
547 spindle or Golgi tendon organ afferents following standard procedures described in detail  
548 elsewhere<sup>17,18,41</sup>. In total, 12 muscle spindle afferents (8 ‘type Ia’ and 4 ‘type II’) and 3 Golgi  
549 tendon organ afferents were recorded from 9 participants (minimum of one recorded afferent per  
550 included participant). With all afferents a minimum of 24 movement trials were recorded (i.e., 3  
551 repetitions of a movement direction) and with some the recording lasted longer, allowing for more  
552 repetitions to be sampled.

553 As expected, the primary spindle afferents responded with higher overall firing rates to dynamic  
554 muscle stretch than muscle shortening. Just one afferent from a digit actuator was not  
555 responsive to one of the three ‘stretch’ target directions (i.e., upper left direction) but was very  
556 responsive to the other two stretch directions. Likely causes for such variability include the  
557 particular set of fusimotor supply and the precise location of the spindle organ inside the muscle.  
558 The number of afferents recorded in this study reflects that in previous studies examining single  
559 afferent activity during active movement e.g.,<sup>16,41,51</sup>. Moreover, it has been shown that a small  
560 number of spindle afferents can provide a reliable representation of the firing patterns observed  
561 in the underlying afferent population e.g.,<sup>14</sup>. This is not surprising, as all muscle spindle organs  
562 are placed mechanically “in parallel” with the skeletal muscle fibers, and the spindle acts as an  
563 integrator of activity from multiple fusimotor fibers.

#### 564 **Muscle EMG recordings**

565 In the microneurography experiment, custom-build surface electrodes ( $\varnothing$  2 mm; 12 mm apart)  
566 were used for recording EMG from the common digit extensor and digit flexor muscles, as well  
567 as from the four main wrist actuators (extensor carpi radialis, extensor carpi ulnaris, flexor carpi  
568 radialis and flexor carpi ulnaris). The location of each electrode on the forearm was chosen using  
569 a hand-held stimulator probe and isometric contraction/relaxation maneuvers. In experiment ‘2’  
570 and ‘3’, the Delsys Bagnoli system (DE-2.1– Single Differential Electrodes) was used to record  
571 surface EMG from the pectoralis, posterior deltoid and the anterior deltoid. We also recorded  
572 EMG from the brachioradialis, biceps and triceps areas. In all experiments, EMG electrodes were  
573 coated with conductive gel and attached to the skin using double-sided tape.

## 574 **Data sampling and processing**

575 The data generated during the microneurography experiment were sampled digitally using  
576 SC/ZOOM™. Single action potentials were identified semi-automatically under visual control. The  
577 EMG channels recorded during microneurography were root-mean-square processed with a rise-  
578 time constant of 1.0 ms and a decay-time constant of 3.0 ms; they were then digitally sampled at  
579 1600 Hz. The EMG channels were high-pass filtered with a fifth-order, zero-phase-lag  
580 Butterworth filter with a 30 Hz cutoff. Kinematic and force data from the KINARM platform were  
581 sampled at 1 KHz. The recorded EMG signals were band-pass filtered online through the Delsys  
582 EMG system (20-450Hz) and sampled at 2 kHz. This EMG data was also high-pass filtered with  
583 a fifth-order, zero phase-lag Butterworth filter with a 30 Hz cutoff and then rectified. To be able to  
584 compare and combine EMG and afferent data across muscles and participants, the raw data  
585 were normalized (z-transformed), similar to the procedure described elsewhere<sup>16,35,41,52</sup>. Briefly,  
586 for each individual muscle (or individual afferent), all relevant raw data traces were concatenated,  
587 and a grand mean and standard deviation was generated. These two numbers were then used to  
588 produce the normalized 'raw' EMG data for each muscle or produce the normalized firing rate of  
589 each afferent (i.e., by subtracting the grand mean and then dividing by the standard deviation).  
590 Exemplary untreated raw data are also presented (Fig. 1b-c). For plotting purposes alone,  
591 continuous firing rate signals were smoothed using 10 ms moving window (i.e., Fig. 2b) and a 5  
592 ms moving window was used for EMG signals (e.g., Figs. 5-7). Throughout, data tabulations  
593 were performed using Matlab® (MathWorks, Natick, MA, USA).

## 594 **Procedures for statistical analyses**

595 The main statistical approach involved conducting repeated-measures t-tests and ANOVA, and  
596 complementary planned comparisons on kinematic, EMG and normalized spindle firing rate data  
597 observed during the preparatory periods (experiment '1'), and single sample t-tests on EMG data  
598 pertaining to spinal monosynaptic reflex responses elicited during haptic perturbations  
599 (experiment '2' & '3'). Specifically, with regard to the analysis of the afferent data, it is known that  
600 kinematic variables such as position (i.e., muscle length) and its derivatives as well as spindle-  
601 bearing EMG activity can affect spindle output, with muscle velocity (i.e., first derivative of muscle  
602 length) believed to normally exert the largest influence. To generate estimates of muscle length  
603 (tendon excursion) from the recorded wrist angular data we used established physiological  
604 models<sup>53,54</sup> as done previously elsewhere<sup>16-18</sup>. The impact of kinematic and EMG variables on

605 primary spindle afferent output during movement was examined by performing a forward step-  
606 wise regression using population signals (i.e., grand mean of median responses from single  
607 participants/neurons; Fig. 3). However, as expected, kinematic and EMG variables represented  
608 very small levels of variability during the main period of interest (i.e., immobile hand during the  
609 preparatory period; Supplementary Fig. 1). The main analyses of data from ‘Experiment 1’  
610 examined potential effects of the goal/target of each trial (i.e., prospective movement direction:  
611 muscle stretch vs. shortening) during movement preparation, and no systematic variation in  
612 kinematic variables or EMG was found as a function of goal (Supplementary Fig. 2).

613 To investigate the impact of goal we grouped different trials into those associated with clear  
614 stretch vs. clear shortening of the spindle-bearing muscle (Fig. 2a) based on the aforementioned  
615 physiological models, but this grouping is nevertheless intuitive and straightforward (e.g., for the  
616 radial wrist extensor, targets requiring wrist flexion and/or ulna deviation were classified as  
617 ‘muscle stretch’ targets). For each single afferent, the normalized raw data across trials were first  
618 aligned to the onset of the target cue. To more clearly isolate possible changes in firing rate as a  
619 function of target, the median firing rate observed during the 0.5 sec period before target onset  
620 (‘baseline’) was subtracted from the entire firing rate signal on a trial by trial basis. The firing rate  
621 signals were collapsed across trials in order to get a single averaged (median) response signal  
622 for each afferent and target group (i.e., ‘stretch’ vs. muscle ‘shortening’ targets). Averaging  
623 across all afferent signals for each target group gave an estimate of population responses (Fig.  
624 2b). From each averaged afferent signal, the data points used in statistical tests (ANOVA / t-test)  
625 were the median value across each of three epochs of equal length, termed ‘Epoch 1’, ‘2’ and ‘3’  
626 (Fig. 2b-c). The data-points pertaining to individual spindle afferents (i.e., Fig. 2c) were entered  
627 into a two-way repeated-measures ANOVA, of the design 2 (goal/direction) x 3 (Epoch). Single-  
628 sample t-tests, planned comparisons and simple linear correlations were also performed. The  
629 same single-sample t-test analyses were also performed with kinematic and EMG data, as  
630 described in the Results section.

631 With regard to Stretch Reflex (SR) responses to haptic perturbations (i.e., experiment ‘2’ & ‘3’),  
632 the analyses focused on established time-periods known to reflect the output of spinal circuits.  
633 Specifically, across all experiments, the onset of movement or kinematic perturbation was  
634 defined as the point where movement velocity (i.e., 1<sup>st</sup> derivative of Euclidean displacement)

635 exceeded 5% of peak velocity during the perturbation phase (note the position-controlled  
636 perturbations had an approximate bell-shaped velocity profile). Using the onset of the kinematic  
637 perturbation to signify time zero, the spinal SR response is defined as that occurring in the epoch  
638 25 – 50 ms post perturbation e.g.,<sup>23,40</sup>. The magnitude of the spinal SR response was  
639 representative of changes in gain, as the same input (perturbation) was provided when the hand  
640 was at a common start position. Longer-latency responses are also displayed throughout (e.g.,  
641 Figs. 5-7). An epoch of the same length as the SR one was used for representing pre-  
642 perturbation muscle activity (i.e., -25 – 0 ms). Unlike the case of the behavioral task during  
643 microneurography, the participants received no prior training in the main behavioral task with the  
644 robot. As the situation of interacting with a robot that perturbs one's hand on every trial is also  
645 less than completely naturalistic, the initial five repetitions of each trial type were considered to  
646 be 'familiarity' trials and were excluded from analyses; excluding a number of initial trials is a  
647 common approach in similar robot-based sensorimotor control studies, e.g.,<sup>55</sup>. In experiment '2',  
648 three preparatory delays were used (.25, .75 and 1.25 sec), reflecting the middle of each of the  
649 three epochs used for analyses in experiment '1' (Fig. 2b). As expected from the afferent findings  
650 (Fig. 2c), visual inspection on EMG signals confirmed that a similar suppression of spinal SR  
651 occurred for the two longer delays (e.g., Fig. 5c-e represents trials where the delay was 0.75). The  
652 data were therefore collapsed across the two delays, to represent one 'long' delay condition (Fig.  
653 6a-h). The relevant data used in statistical analyses for each participant were generated by first  
654 creating averages (medians) of EMG signals across repetitions of a relevant trial type that  
655 involved stretch of the particular muscle (i.e., EMG signals during muscle shortening were not  
656 analyzed in the current study as we were interested in SR responses). The average value within  
657 the epoch of interest was then taken, producing a single data-point per muscle and trial type. To  
658 simplify analyses (i.e., concentrate on the main manipulation of interest while accounting for  
659 known effects of e.g., muscle loading), for each individual muscle, EMG data of a particular load  
660 and delay were contrasted in terms of the target goal, generating a single data point that was  
661 ultimately used for statistical analyses as part of a single-sample t-test (see e.g., Fig. 6d and 6h).

662 All statistical comparisons were two-tailed, and the overall baseline statistical significance level  
663 was 0.05. Tukey's HSD test was used for any post-hoc analyses. No statistical methods were  
664 used for pre-determining sample sizes but the sizes used are similar to those reported in  
665 previous studies. Data normality was confirmed using the Shapiro-Wilks test for samples with

666 <50 data-points and Lilliefors test for larger samples. Statistical tests were performed using either  
667 MATLAB® (MathWorks, Natick, MA, USA) or STATISTICA® (StatSoft Inc, USA).

668

## References

- 669 1 Kurata, K. Premotor cortex of monkeys: set- and movement-related activity reflecting  
670 amplitude and direction of wrist movements. *J. Neurophysiol.* **69**, 187-200 (1993).
- 671 2 Messier, J. & Kalaska, J. F. Covariation of primate dorsal premotor cell activity with direction  
672 and amplitude during a memorized-delay reaching task. *J. Neurophysiol.* **84**, 152-165  
673 (2000).
- 674 3 Shen, L. & Alexander, G. E. Preferential representation of instructed target location versus  
675 limb trajectory in dorsal premotor area. *J. Neurophysiol.* **77**, 1195-1212 (1997).
- 676 4 Tanji, J. & Evarts, E. V. Anticipatory activity of motor cortex neurons in relation to direction of  
677 an intended movement. *J. Neurophysiol.* **39**, 1062-1068 (1976).
- 678 5 Churchland, M. M. *et al.* Neural population dynamics during reaching. *Nature* **487**, 51-56  
679 (2012).
- 680 6 Churchland, M. M., Cunningham, J. P., Kaufman, M. T., Ryu, S. I. & Shenoy, K. V. Cortical  
681 preparatory activity: representation of movement or first cog in a dynamical machine?  
682 *Neuron* **68**, 387-400 (2010).
- 683 7 Michaels, J. A., Dann, B., Intveld, R. W. & Scherberger, H. Neural dynamics of variable  
684 grasp-movement preparation in the macaque frontoparietal network. *J. Neurosci.* **38**, 5759-  
685 5773 (2018).
- 686 8 Pasquereau, B. & Turner, R. S. Dopamine neurons encode errors in predicting movement  
687 trigger occurrence. *J. Neurophysiol.* **113**, 1110-1123 (2015).
- 688 9 Rosenbaum, D. A. Human movement initiation: specification of arm, direction, and extent. *J.*  
689 *Exp. Psychol. Gen.* **109**, 444-474 (1980).
- 690 10 Ghez, C. *et al.* Discrete and continuous planning of hand movements and isometric force  
691 trajectories. *Exp. Brain Res.* **115**, 217-233 (1997).
- 692 11 Haith, A. M., Pakpoor, J. & Krakauer, J. W. Independence of movement preparation and  
693 movement Initiation. *J. Neurosci.* **36**, 3007-3015 (2016).
- 694 12 Matthews, P. B. C. in *Mammalian muscle receptors and their central actions*. (Edward  
695 Arnold Publishers Ltd, 1972).



- 696 13 Hasan, Z. & Houk, J. C. Transition in sensitivity of spindle receptors that occurs when  
697 muscle is stretched more than a fraction of a millimeter. *J. Neurophysiol.* **38**, 673-689  
698 (1975).
- 699 14 Prochazka, A. in *Exercise: Regulation and integration of multiple systems* Vol. 12 (eds L.  
700 Rowell & J. T. Shepherd) 89-127 (American Physiological Society, 1996).
- 701 15 Blum, K. P., Lamotte D'Incamps, B., Zytnicki, D. & Ting, L. H. Force encoding in muscle  
702 spindles during stretch of passive muscle. *PLoS Comp. Biol.* **13**, e1005767, (2017).
- 703 16 Dimitriou, M. Enhanced muscle afferent signals during motor learning in humans. *Curr. Biol.*  
704 **26**, 1062-1068 (2016).
- 705 17 Dimitriou, M. & Edin, B. B. Discharges in human muscle spindle afferents during a key-  
706 pressing task. *J. Physiol.* **586**, 5455-5470 (2008).
- 707 18 Dimitriou, M. & Edin, B. B. Discharges in human muscle receptor afferents during block  
708 grasping. *J. Neurosci.* **28**, 12632-12642 (2008).
- 709 19 Marsden, C. D., Merton, P. A. & Morton, H. B. Servo action in the human thumb. *J. Physiol.*  
710 **257**, 1-44 (1976).
- 711 20 Matthews, P. B. Observations on the automatic compensation of reflex gain on varying the  
712 pre-existing level of motor discharge in man. *J. Physiol.* **374**, 73-90 (1986).
- 713 21 Pruszynski, J. A., Kurtzer, I., Lillicrap, T. P. & Scott, S. H. Temporal evolution of "automatic  
714 gain-scaling". *J. Neurophysiol.* **102**, 992-1003 (2009).
- 715 22 Pruszynski, J. A. & Scott, S. H. Optimal feedback control and the long-latency stretch  
716 response. *Exp. Brain Res.* **218**, 341-359 (2012).
- 717 23 Scott, S. H. The computational and neural basis of voluntary motor control and planning.  
718 *Trends Cogn. Sci.* **16**, 541-549 (2012).
- 719 24 Scott, S. H. A Functional taxonomy of bottom-up sensory feedback processing for motor  
720 actions. *Trends Neurosci.* **39**, 512-526 (2016).
- 721 25 Fellows, S. J., Domges, F., Topper, R., Thilmann, A. F. & Noth, J. Changes in the short- and  
722 long-latency stretch reflex components of the triceps surae muscle during ischaemia in man.  
723 *J Physiol* **472**, 737-748 (1993).
- 724 26 Burke, D., McKeon, B., Skuse, N. F. & Westerman, R. A. Anticipation and fusimotor activity  
725 in preparation for a voluntary contraction. *J. Physiol.* **306**, 337-348 (1980).
- 726 27 Fetz, E. E., Perlmutter, S. I., Prut, Y., Seki, K. & Votaw, S. Roles of primate spinal  
727 interneurons in preparation and execution of voluntary hand movement. *Brain Res. Rev.* **40**,  
728 53-65 (2002).

- 729 28 Prut, Y. & Fetz, E. E. Primate spinal interneurons show pre-movement instructed delay  
730 activity. *Nature* **401**, 590-594 (1999).
- 731 29 Shenoy, K. V., Sahani, M. & Churchland, M. M. Cortical control of arm movements: a  
732 dynamical systems perspective. *Annu. Rev. Neurosci.* **36**, 337-359 (2013).
- 733 30 Soteropoulos, D. S. Corticospinal gating during action preparation and movement in the  
734 primate motor cortex. *J. Neurophysiol.* **119**, 1538-1555 (2018).
- 735 31 Wurtz, R. H. & Albano, J. E. Visual-motor function of the primate superior colliculus. *Annu*  
736 *Rev Neurosci* **3**, 189-226 (1980).
- 737 32 Dorris, M. C., Olivier, E. & Munoz, D. P. Competitive integration of visual and preparatory  
738 signals in the superior colliculus during saccadic programming. *J. Neurosci.* **27**, 5053-5062  
739 (2007).
- 740 33 Sprague, J. M. Neural mechanisms of visual orienting responses. *Prog. Brain Res.* **112**, 1-  
741 15 (1996).
- 742 34 Hagbarth, K. E. EMG studies of stretch reflexes in man. *Electroencephalogr. Clin.*  
743 *Neurophysiol.*, Suppl 25:74-29 (1967).
- 744 35 Dimitriou, M. Task-dependent modulation of spinal and transcortical stretch reflexes linked  
745 to motor learning rate. *Behav. Neurosci.* **132**, 194-209 (2018).
- 746 36 Kakuda, N. & Nagaoka, M. Dynamic response of human muscle spindle afferents to stretch  
747 during voluntary contraction. *J. Physiol.* **513**, 621-628 (1998).
- 748 37 Pruszynski, J. A. *et al.* Primary motor cortex underlies multi-joint integration for fast  
749 feedback control. *Nature* **478**, 387-390 (2011).
- 750 38 Kurtzer, I. L., Pruszynski, J. A. & Scott, S. H. Long-latency reflexes of the human arm reflect  
751 an internal model of limb dynamics. *Curr. Biol.* **18**, 449-453 (2008).
- 752 39 Pruszynski, J. A., Kurtzer, I. & Scott, S. H. The long-latency reflex is composed of at least  
753 two functionally independent processes. *J. Neurophysiol.* **106**, 449-459 (2011).
- 754 40 Weiler, J., Gribble, P. L. & Pruszynski, J. A. Spinal stretch reflexes support efficient hand  
755 control. *Nat. Neurosci.* **22**, 529-533 (2019).
- 756 41 Dimitriou, M. Human muscle spindle sensitivity reflects the balance of activity between  
757 antagonistic muscles. *J. Neurosci.* **34**, 13644-13655 (2014).
- 758 42 Ackerley, R., Chancel, M., Aimonetti, J. M., Ribot-Ciscar, E. & Kavounoudias, A. Seeing  
759 your foot move changes muscle proprioceptive feedback. *eNeuro* **6** (2019).
- 760 43 Vallbo, A. B. Discharge patterns in human muscle spindle afferents during isometric  
761 voluntary contractions. *Acta Physiol. Scand.* **80**, 552-566 (1970).

- 762 44 Prochazka, A., Hulliger, M., Zangger, P. & Appenteng, K. 'Fusimotor set': new evidence for  
763 alpha-independent control of gamma-motoneurons during movement in the awake cat.  
764 *Brain Res.* **339**, 136-140 (1985).
- 765 45 Franklin, D. W. & Wolpert, D. M. Computational mechanisms of sensorimotor control.  
766 *Neuron* **72**, 425-442 (2011).
- 767 46 Shergill, S. S., Bays, P. M., Frith, C. D. & Wolpert, D. M. Two eyes for an eye: the  
768 neuroscience of force escalation. *Science* **301**, 187 (2003).
- 769 47 Wolpert, D. M. & Ghahramani, Z. Computational principles of movement neuroscience. *Nat.*  
770 *Neurosci.* **3 Suppl**, 1212-1217 (2000).
- 771 48 Wolpert, D. M., Ghahramani, Z. & Jordan, M. I. An internal model for sensorimotor  
772 integration. *Science* **269**, 1880-1882 (1995).
- 773 49 Wolpert, D. M. & Miall, R. C. Forward models for physiological motor control. *Neural Netw.*  
774 **9**, 1265-1279 (1996).
- 775 50 Vallbo, A. B. & Hagbarth, K. E. Mechnoreceptor activity recorded from human peripheral  
776 nerves. *Electroencephalogr. Clin. Neurophysiol.* **25**, 407 (1968).
- 777 51 Vallbo, A. B. & al-Falahe, N. A. Human muscle spindle response in a motor learning task. *J.*  
778 *Physiol.* **421**, 553-568 (1990).
- 779 52 Dimitriou, M., Franklin, D. W. & Wolpert, D. M. Task-dependent coordination of rapid  
780 bimanual motor responses. *J. Neurophysiol.* **107**, 890-901 (2012).
- 781 53 Elliot, D. & McGrouther, D. A. The excursions of the long extensor tendons of the hand. *J.*  
782 *Hand Surg. Br.* **11**, 77-80 (1986).
- 783 54 Pigeon, P., Yahia, L. & Feldman, A. G. Moment arms and lengths of human upper limb  
784 muscles as functions of joint angles. *J. Biomech.* **29**, 1365-1370 (1996).
- 785 55 Dimitriou, M., Wolpert, D. M. & Franklin, D. W. The temporal evolution of feedback gains  
786 rapidly update to task demands. *J Neurosci* **33**, 10898-10909 (2013).

787

## Acknowledgements

788 This work was supported by grants awarded to M.D. by the Kempe Foundation, the local  
789 Foundation for Medical Research ("Insamlingsstiftelsen") and the Swedish Research Council  
790 (project 2016-02237). The funders had no role in study design, data collection and analysis,  
791 decision to publish or preparation of the manuscript. The authors would like to thank J.A.  
792 Pruszynski and D.W. Franklin for comments on the initial draft of this manuscript.

## Author contributions

793

794 M.D. conceptualized and designed the study, M.D. collected the neural data, M.D. and S.P.  
795 analyzed the data, interpreted the results and wrote the manuscript.

## Figure Legends

796

797 **Fig. 1: First experimental setup and representative single trial data.** **a** The general setup of  
798 experiment '1'. Participants were asked to perform the classic delayed-reach task using their  
799 right hand. From an initial semi-pronated position, wrist flexion-extension moved a visual cursor  
800 in the horizontal dimension and wrist ulna-radial deviation moved the cursor in the vertical  
801 dimension. **b** Representative data from a single trial where reaching the target required ulna  
802 deviation of the wrist. Muscle length and velocity estimates pertain to the spindle-bearing muscle,  
803 which in this case is the Radial Wrist Extensor (RWE; i.e., *extensor carpi radialis*). Also shown is  
804 surface EMG from the Ulna Wrist Extensor muscle (UWE i.e., *extensor carpi ulnaris*) which  
805 mostly powered the reaching movement. Despite no overt changes in kinematics or EMG during  
806 the preparatory period (grey background), primary spindle afferent ('Ia') responses decreased,  
807 particularly at the latter half of this period. **c** The same neuron as 'b' but here the target was in  
808 the opposite direction, requiring radial deviation at the wrist and therefore shortening of the RWE.  
809 No decrease in firing rate was observed during the preparatory period. Throughout, dashed grey  
810 lines represent zero values.

811 **Fig. 2: Goal-dependent tuning of muscle spindle receptors during movement preparation.**  
812 **a** The visual targets were categorized based on whether reaching them required stretching or  
813 shortening of the spindle-bearing muscle. According to published physiological models for each  
814 muscle (see Methods), six targets represented clear and substantial change in muscle length,  
815 whereas two 'intermediate' targets (circle outlines) represented little or no muscle stretch or  
816 shortening. **b** Top panel represents mean stretch velocity of the recorded spindle-bearing  
817 muscles, essentially indicating no overt movement occurred in the preparatory period (see also  
818 Supplementary Figs. 1-2). The bottom panel represents mean change in primary spindle afferent  
819 ('Ia') firing rates. All traces are aligned to onset of the target cue (time '0'). Purple and blue traces  
820 represent targets associated with stretch and shortening of the spindle-bearing muscle,  
821 respectively. Shading represents  $\pm 1$  s.e.m. **c** Average Ia firing rates in the three epochs ('1-3') as

822 shown in 'b'. Thin grey lines represent individual Ia afferents from wrist extensor muscles and  
823 thin black lines represent Ia afferents from digit extensors. The shaded bars represent 95%  
824 confidence intervals and \*  $p < 0.05$  following paired t-test. Same color scheme is used throughout.  
825 Goal-dependent decreases in tonic Ia firing rate may reflect a decrease in 'dynamic' fusimotor  
826 output to spindles; such fusimotor supply is known to have a much stronger effect on the  
827 spindles' sensitivity to dynamic muscle stretch (i.e., gain).

828 **Fig. 3: Muscle spindle receptors are relatively insensitive to acceleration during delayed**  
829 **reaching.** **a** Type Ia population responses and associated spindle-bearing muscle kinematics  
830 and EMG. The signals were generated by averaging (mean) across the median responses of  
831 participants with whom a single afferent was recorded. Signals are aligned to peak velocity (time  
832 '0'). **b** We used spindle-bearing muscle length, velocity, acceleration and EMG in a single  
833 regression as predictors of afferent firing rate (i.e., data shown in 'a', but down-sampled with a 50  
834 ms moving average). 'Beta' regression coefficients are shown for facilitating comparison across  
835 predictors; these coefficients reflect the degree of change in the dependent variable (in units of  
836 s.d.) given a 1 s.d. change in the predictor variable. Error bars represent +/- 1 s.e.m. Black  
837 represents a statistically significant impact ( $p < 0.05$ ). **c** As 'b' but for spindle afferents originating  
838 from the Radial Wrist Extensor (RWE) muscle alone. Both velocity and acceleration were  
839 significant predictors but the impact of acceleration on Ia firing rate is ~half of that observed when  
840 performing reaching movements in the absence of a preparatory period (beta > 0.5; see<sup>17</sup>). **d-e**  
841 As expected, there was a strong significant relationship between velocity and type Ia firing rates  
842 across all recorded Ia afferents ('d') and those of the RWE alone ('e'). **f-g** There was no  
843 significant relationship between acceleration and firing rate across all recorded Ia afferents ('f'),  
844 nor with those from the RWE ('g').

845 **Fig. 4: Spindle firing rates at late movement preparation predict performance during**  
846 **reaching.** Throughout, each data point represents the average (median) value of a single  
847 participant/afferent across trials where reaching the target required stretch of the spindle-bearing  
848 muscle. The left column of panels pertains to wrist muscles (grey dots), and the right represents  
849 all Ia afferents, including those originating from digit extensor muscles (black). **a-b** The horizontal  
850 axes represent Ia firing rates during the late preparation epoch (epoch '3' as defined in Figure 2b)  
851 and vertical axes represent reaction time i.e., the time between onset of the target cue and onset

852 of the reaching movement. **c** The vertical axes represent time between onset of reaching and the  
853 initial peak velocity of reaching movement; there was a strong positive relationship with tonic Ia  
854 firing from muscles engaged in powering hand movement in the current task (wrist actuators). **d**  
855 With the exception of one participant/afferent (black star), movement performance was well  
856 described by the same relationship (i.e., 3 ms delay in attaining peak velocity for every additional  
857 spike/sec).

858 **Fig. 5: The second experiment and representative data from a single participant.** **a** The  
859 general setup of experiment '2'. Participants held the graspable end of a robotic manipulandum.  
860 Vision was directed at a one-way mirror, on which the contents of a monitor were projected.  
861 Hand position was represented by a visual cursor. Although not shown here, the right forearm  
862 rested on an air-sled and the hand was immobile around the wrist (see Methods for more  
863 details). **b** The timeline of experimental manipulations. Each trial begun by slowly loading the  
864 hand in the upper left direction (i.e., -X and +Y direction) or lower right direction (+X and -Y), or  
865 there was no load ('null' load). The participants had to maintain the hand immobile at origin  
866 despite any loading. One of two visual targets was then suddenly cued (turned red) and this state  
867 lasted for a relatively short delay (0.25 sec) or long delay (0.75 or 1.25 sec; see Methods). These  
868 preparatory delays correspond to the middle of epochs '1-3' (Fig. 2b-c). At the end of the delay  
869 the hand was rapidly perturbed towards or in the opposite direction of the cued target. The  
870 perturbation lasted for 150 ms; at its end the 'Go' signal was given (cued target turned green)  
871 and movement to the target had to be completed. Cursor position was frozen during the  
872 perturbation. Trials were block-randomized, hence perturbation direction was unpredictable even  
873 after experiencing a particular load and cue. **c-e** Relevant median signals from a single  
874 participant when perturbations stretched the pectoralis muscle, following a 0.75 sec preparatory  
875 period after the muscle was unloaded ('c'), when there was no external load ('d') and when the  
876 pectoralis was (pre-)loaded ('e'). Data are aligned to the onset of perturbation (time '0'), defined  
877 as the point where movement speed reached 5% of initial peak value.

878 **Fig. 6: Goal-dependent tuning of spinal stretch reflex gains and its attenuation.** **a-c** Mean  
879 hand position (posn.) and mean rectified pectoralis EMG activity across participants when this  
880 muscle was unloaded ('a'), when there was no external load ('b'; but note increased EMG levels  
881 prior to time '0' due to co-contraction), and when the pectoralis was externally loaded ('c'). As the

882 schematic on the far left indicates, the data represent trials where the preparatory delay was  
883 relatively long and the subsequent perturbation stretched the pectoralis. SR denotes the epoch  
884 associated with the spinal stretch reflex. **d** Difference in mean pectoralis EMG activity (purple  
885 minus blue) in the spinal SR epoch, corresponding to the data shown in 'a-c'. Dots represent  
886 individual participants and thick vertical lines represent 95% confidence intervals. The spinal SR  
887 of the unloaded pectoralis is suppressed in a goal-dependent manner ('a'), this relative  
888 suppression effect remains but weakens when the muscle is relatively lightly loaded by self-  
889 imposed co-contraction ('b') and goal-dependent modulation disappears entirely when the  
890 muscle is strongly pre-loaded ('c'). **e-h** As top row of panels but representing trials where the  
891 preparatory delay was short (0.25 sec).

892 **Fig. 7: Third experiment also demonstrates goal-dependent tuning of stretch reflex gains.**

893 Experiment '3' was conducted as per experiment '2' (Figs. 5a-b) except in this case six targets  
894 were employed rather than two (see left schematics) and the long and short preparatory delays  
895 were 1.2 and 0.2 sec, respectively. **a-c** Mean hand position (posn.) and mean rectified pectoralis  
896 EMG activity across participants when this muscle was unloaded ('a'), when there was no  
897 external load ('b'; note increased EMG levels prior to time '0' due to co-contraction), and when  
898 the pectoralis was externally loaded ('c'). The data represent trials where the preparatory delay  
899 was relatively long and the subsequent perturbation stretched the pectoralis. SR denotes the  
900 epoch associated with the spinal stretch reflex. **d** Difference in mean pectoralis EMG activity  
901 (purple minus blue) in the spinal SR epoch, corresponding to the data shown in 'a-c'. Dots  
902 represent individual participants and thick vertical lines represent 95% confidence intervals. **e-h**  
903 As the top row of panels but representing trials where the preparatory delay was relatively short.

904 **Supplementary Figure 1: Population signals before, during and after movement**

905 **preparation** Mean stretch velocity, acceleration, EMG and spindle type Ia signals across all  
906 recorded spindle-bearing muscles. The traces are aligned to onset of the target cue (time '0') as  
907 per Figure 2b. Purple and blue traces represent targets associated with stretch and shortening of  
908 the spindle-bearing muscle, respectively. Shading represents  $\pm 1$  s.e.m. Here, signals are also  
909 shown for the short period (0.3 sec) following onset of the Go signal where reaching movement  
910 begun to occur.

911 **Supplementary Figure 2: Very small deviations in kinematic signals and variability in EMG**  
912 **during preparation are unrelated to spindle tuning. a-d** Spindle-bearing muscle length,  
913 velocity, acceleration and EMG, respectively, corresponding to the afferent data presented in  
914 Figure 2c. Thin grey lines represent data from individual wrist extensor muscles and thin black  
915 lines represent data from digit extensors. The shaded bars represent 95% confidence intervals.  
916 The same color scheme is used throughout. As expected, deviations in these variables were  
917 minor and, importantly, none of the groups systematically differed from baseline, and no trends  
918 similar to those observed in Ia firing were seen (i.e., purple epoch '3' < epoch '1'; Fig. 2c). Scales  
919 of normalized values (z) are also shown, reinforcing that deviations in these variables during  
920 preparation were very small compared to the changes observed across the full duration of the  
921 delayed-reach task.

922 **Supplementary Figure 3: Type II and type Ib responses during movement preparation. a**  
923 As Figure 2c but representing secondary muscle spindle afferents ('type II'). **b** Same format as 'a'  
924 but representing afferent activity from Golgi tendon organ afferents ('type Ib'). **c** Same format as  
925 'b' but representing Golgi-bearing muscle EMG.

926 **Supplementary Figure 4: Kinematic signals and EMG at late movement preparation do not**  
927 **predict time to peak velocity.** As Figure 4c but horizontal axes pertain to spindle-bearing  
928 muscle length (**a**), velocity (**b**), acceleration (**c**), and EMG (**d**). There was no significant  
929 relationship between any of these variables and time to peak velocity during reaching.

930 **Supplementary Figure 5: Similar goal-dependent effects on stretch reflex gain of the**  
931 **posterior deltoid. a-c** Mean hand position (posn.) and mean rectified posterior deltoid EMG  
932 activity across participants when this muscle was externally loaded ('a'), when there was no  
933 external load ('b'), and when it was externally loaded ('c'). As the schematic on the far left  
934 indicates, the data here represent trials where the preparatory delay was relatively long and the  
935 subsequent perturbation stretched the posterior deltoid. SR denotes the epoch associated with  
936 the spinal stretch reflex. **d** There was a consistent pattern of posterior deltoid suppression,  
937 equivalent to that observed for the pectoralis (Fig. 6d; see also Results). **e-h** As top row of panels  
938 but representing trials where the preparatory delay was short (0.25 sec).



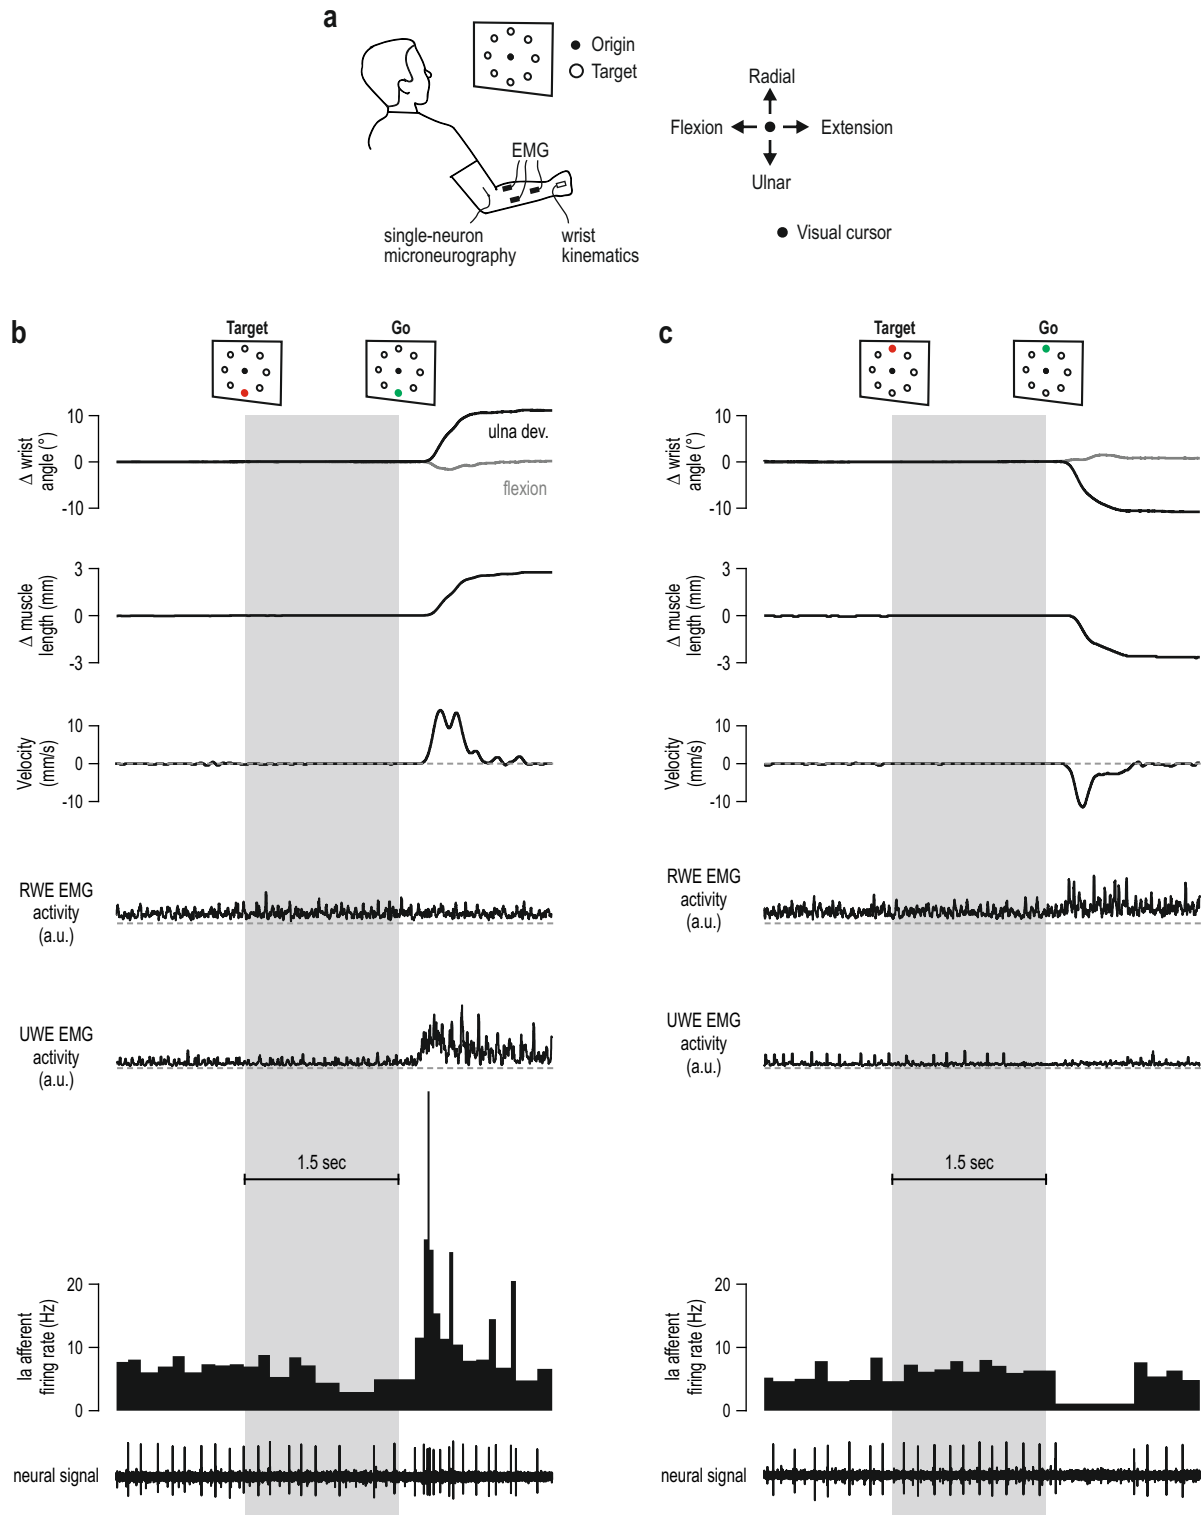

**Fig. 1: First experimental setup and representative single trial data.**

**a** The general setup of experiment '1'. Participants were asked to perform the classic delayed-reach task using their right hand. From an initial semi-pronated position, wrist flexion-extension moved a visual cursor in the horizontal dimension and wrist ulna-radial deviation moved the cursor in the vertical dimension. **b** Representative data from a single trial where reaching the target required ulna deviation of the wrist. Muscle length and velocity estimates pertain to the spindle-bearing muscle, which in this case is the Radial Wrist Extensor (RWE; i.e., *extensor carpi radialis*). Also shown is surface EMG from the Ulna Wrist Extensor muscle (UWE i.e., *extensor carpi ulnaris*) which mostly powered the reaching movement. Despite no overt changes in kinematics or EMG during the preparatory period (grey background), primary spindle afferent ('la') responses decreased, particularly at the latter half of this period. **c** The same neuron as 'b' but here the target was in the opposite direction, requiring radial deviation at the wrist and therefore shortening of the RWE. No decrease in firing rate was observed during the preparatory period. Throughout, dashed grey lines represent zero values.

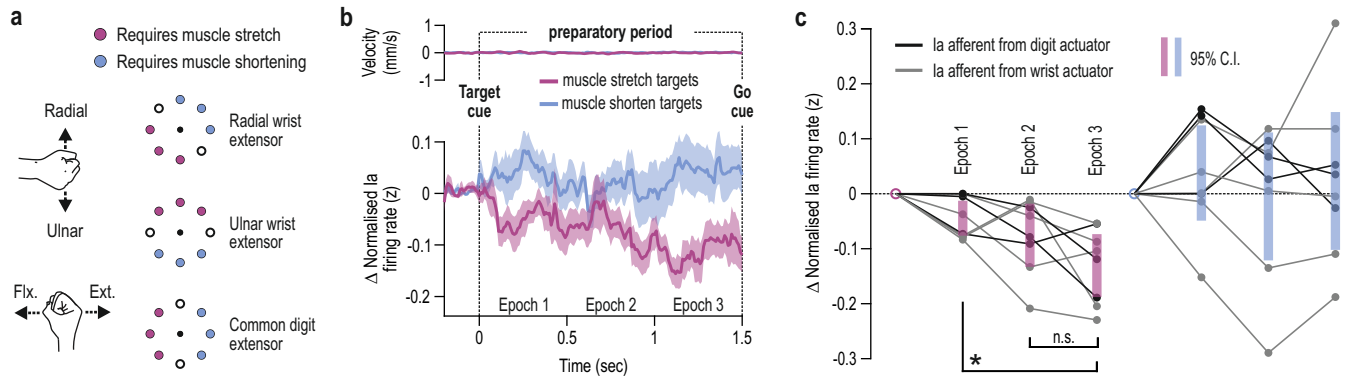

**Fig. 2: Goal-dependent tuning of muscle spindle receptors during movement preparation.**

**a** The visual targets were categorized based on whether reaching them required stretching or shortening of the spindle-bearing muscle. According to published physiological models for each muscle (see Methods), six targets represented clear and substantial change in muscle length, whereas two 'intermediate' targets (circle outlines) represented little or no muscle stretch or shortening. **b** Top panel represents mean stretch velocity of the recorded spindle-bearing muscles, essentially indicating no overt movement occurred in the preparatory period (see also Supplementary Figs. 1-2). The bottom panel represents mean change in primary spindle afferent ('Ia') firing rates. All traces are aligned to onset of the target cue (time '0'). Purple and blue traces represent targets associated with stretch and shortening of the spindle-bearing muscle, respectively. Shading represents  $\pm 1$  s.e.m. **c** Average Ia firing rates in the three epochs ('1-3') as shown in 'b'. Thin grey lines represent individual Ia afferents from wrist extensor muscles and thin black lines represent Ia afferents from digit extensors. The shaded bars represent 95% confidence intervals and \*  $p < 0.05$  following paired t-test. Same color scheme is used throughout. Goal-dependent decreases in tonic Ia firing rate may reflect a decrease in 'dynamic' fusimotor output to spindles; such fusimotor supply is known to have a much stronger effect on the spindles' sensitivity to dynamic muscle stretch (i.e., gain).

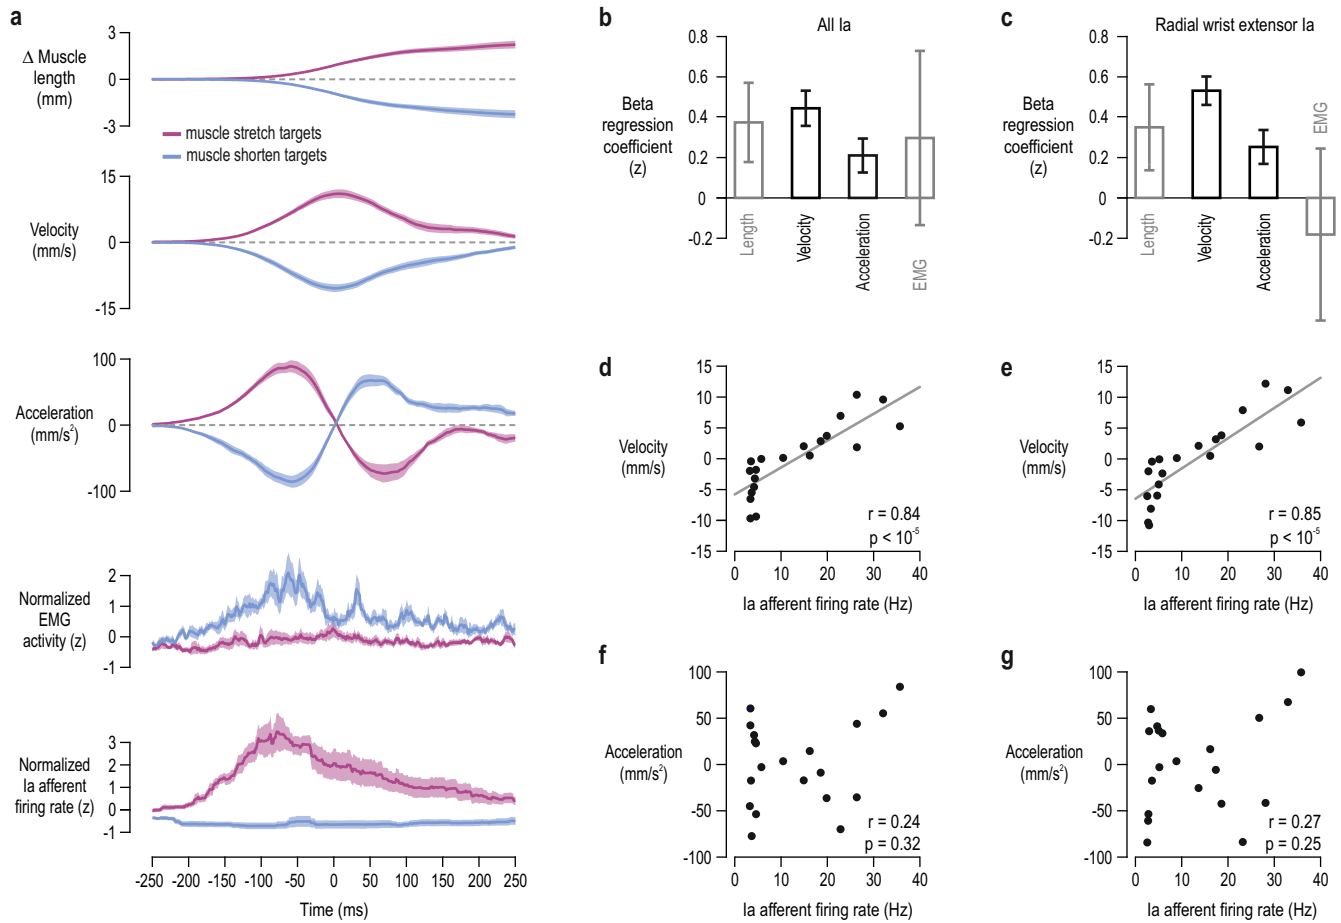

**Fig. 3: Muscle spindle receptors are relatively insensitive to acceleration during delayed reaching.**

**a** Type Ia population responses and associated spindle-bearing muscle kinematics and EMG. The signals were generated by averaging (mean) across the median responses of participants with whom a single afferent was recorded. Signals are aligned to peak velocity (time '0'). **b** We used spindle-bearing muscle length, velocity, acceleration and EMG in a single regression as predictors of afferent firing rate (i.e., data shown in 'a', but down-sampled with a 50 ms moving average). 'Beta' regression coefficients are shown for facilitating comparison across predictors; these coefficients reflect the degree of change in the dependent variable (in units of s.d.) given a 1 s.d. change in the predictor variable. Error bars represent  $\pm 1$  s.e.m. Black represents a statistically significant impact ( $p < 0.05$ ). **c** As 'b' but for spindle afferents originating from the Radial Wrist Extensor (RWE) muscle alone. Both velocity and acceleration were significant predictors but the impact of acceleration on Ia firing rate is  $\sim$ half of that observed when performing reaching movements in the absence of a preparatory period ( $\text{beta} > 0.5$ ; see<sup>17</sup>). **d-e** As expected, there was a strong significant relationship between velocity and type Ia firing rates across all recorded Ia afferents ('d') and those of the RWE alone ('e'). **f-g** There was no significant relationship between acceleration and firing rate across all recorded Ia afferents ('f'), nor with those from the RWE ('g').

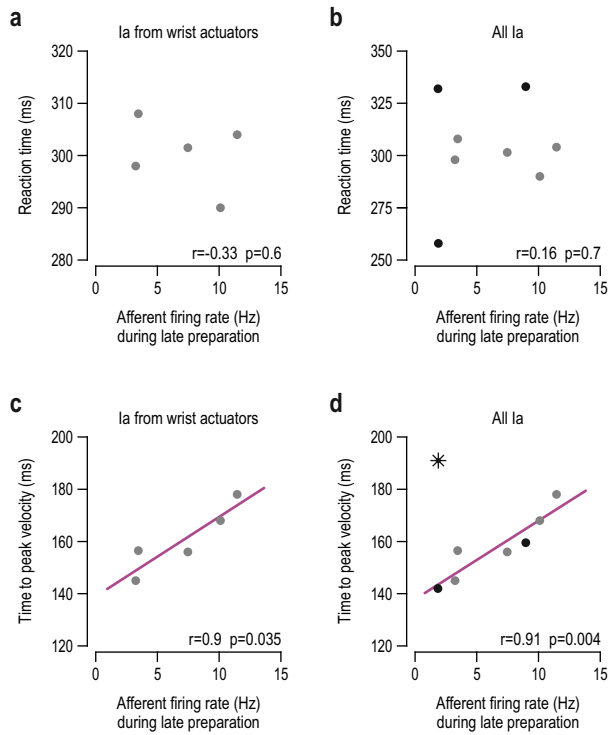

**Fig. 4: Spindle firing rates at late movement preparation predict performance during reaching.**

Throughout, each data point represents the average (median) value of a single participant/afferent across trials where reaching the target required stretch of the spindle-bearing muscle. The left column of panels pertains to wrist muscles (grey dots), and the right represents all Ia afferents, including those originating from digit extensor muscles (black). **a-b** The horizontal axes represent Ia firing rates during the late preparation epoch (epoch '3' as defined in Figure 2b) and vertical axes represent reaction time i.e., the time between onset of the target cue and onset of the reaching movement. **c** The vertical axes represent time between onset of reaching and the initial peak velocity of reaching movement; there was a strong positive relationship with tonic Ia firing from muscles engaged in powering hand movement in the current task (wrist actuators). **d** With the exception of one participant/afferent (black star), movement performance was well described by the same relationship (i.e., 3 ms delay in attaining peak velocity for every additional spike/sec).

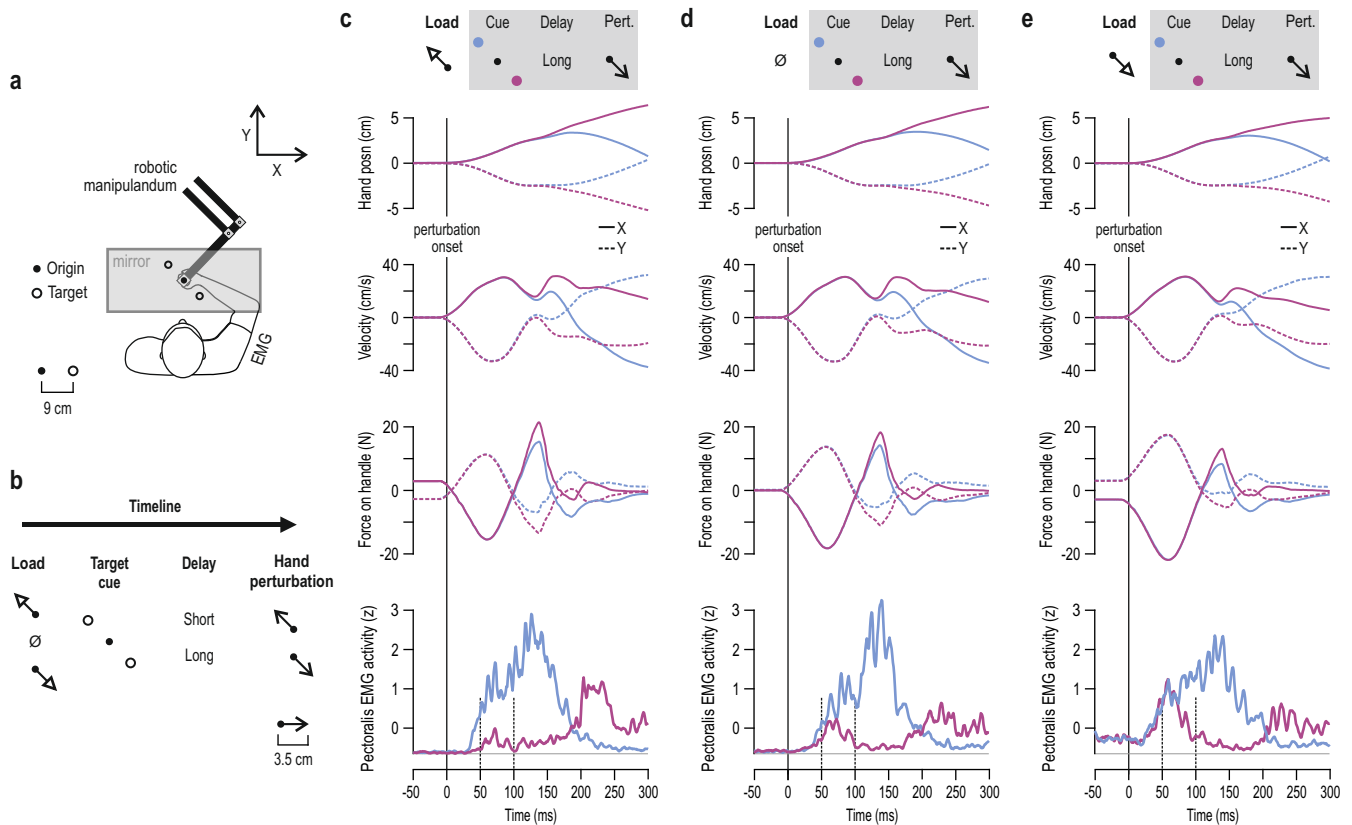

**Fig. 5: The second experiment and representative data from a single participant.**

**a** The general setup of experiment '2'. Participants held the graspable end of a robotic manipulandum. Vision was directed at a one-way mirror, on which the contents of a monitor were projected. Hand position was represented by a visual cursor. Although not shown here, the right forearm rested on an air-sled and the hand was immobile around the wrist (see Methods for more details). **b** The timeline of experimental manipulations. Each trial begun by slowly loading the hand in the upper left direction (i.e., -X and +Y direction) or lower right direction (+X and -Y), or there was no load ('null' load). The participants had to maintain the hand immobile at origin despite any loading. One of two visual targets was then suddenly cued (turned red) and this state lasted for a relatively short delay (0.25 sec) or long delay (0.75 or 1.25 sec; see Methods). These preparatory delays correspond to the middle of epochs '1-3' (Fig. 2b-c). At the end of the delay the hand was rapidly perturbed towards or in the opposite direction of the cued target. The perturbation lasted for 150 ms; at its end the 'Go' signal was given (cued target turned green) and movement to the target had to be completed. Cursor position was frozen during the perturbation. Trials were block-randomized, hence perturbation direction was unpredictable even after experiencing a particular load and cue. **c-e** Relevant median signals from a single participant when perturbations stretched the pectoralis muscle, following a 0.75 sec preparatory period after the muscle was unloaded ('c'), when there was no external load ('d') and when the pectoralis was (pre-)loaded ('e'). Data are aligned to the onset of perturbation (time '0'), defined as the point where movement speed reached 5% of initial peak value.

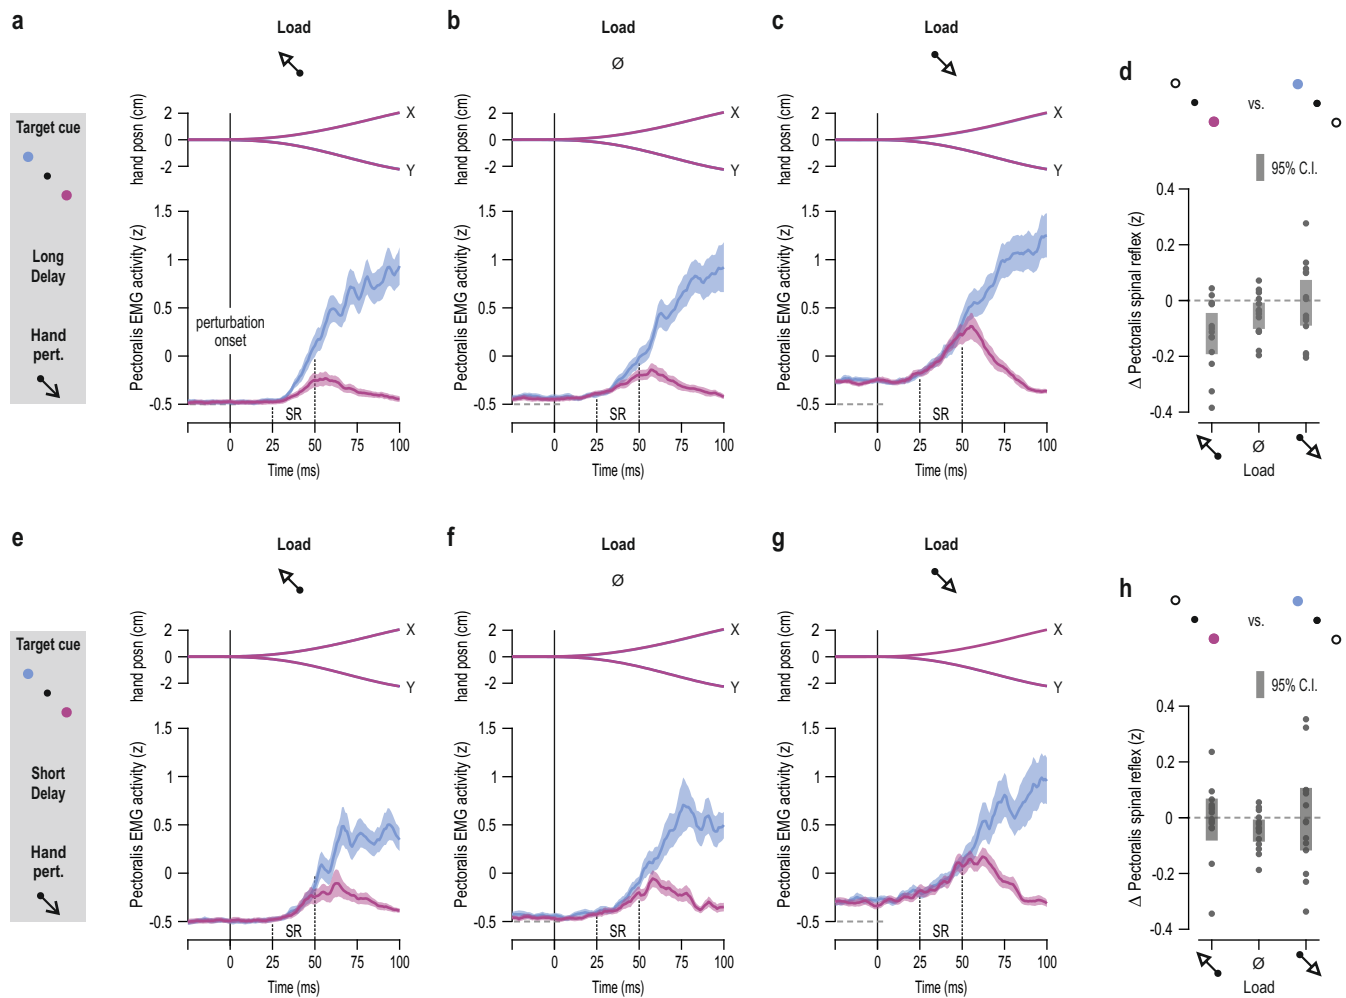

**Fig. 6: Goal-dependent tuning of spinal stretch reflex gains and its attenuation.**

**a-c** Mean hand position (posn.) and mean rectified pectoralis EMG activity across participants when this muscle was unloaded ('a'), when there was no external load ('b'; but note increased EMG levels prior to time '0' due to co-contraction), and when the pectoralis was externally loaded ('c'). As the schematic on the far left indicates, the data represent trials where the preparatory delay was relatively long and the subsequent perturbation stretched the pectoralis. SR denotes the epoch associated with the spinal stretch reflex. **d** Difference in mean pectoralis EMG activity (purple minus blue) in the spinal SR epoch, corresponding to the data shown in 'a-c'. Dots represent individual participants and thick vertical lines represent 95% confidence intervals. The spinal SR of the unloaded pectoralis is suppressed in a goal-dependent manner ('a'), this relative suppression effect remains but weakens when the muscle is relatively lightly loaded by self-imposed co-contraction ('b') and goal-dependent modulation disappears entirely when the muscle is strongly pre-loaded ('c'). **e-h** As top row of panels but representing trials where the preparatory delay was short (0.25 sec).

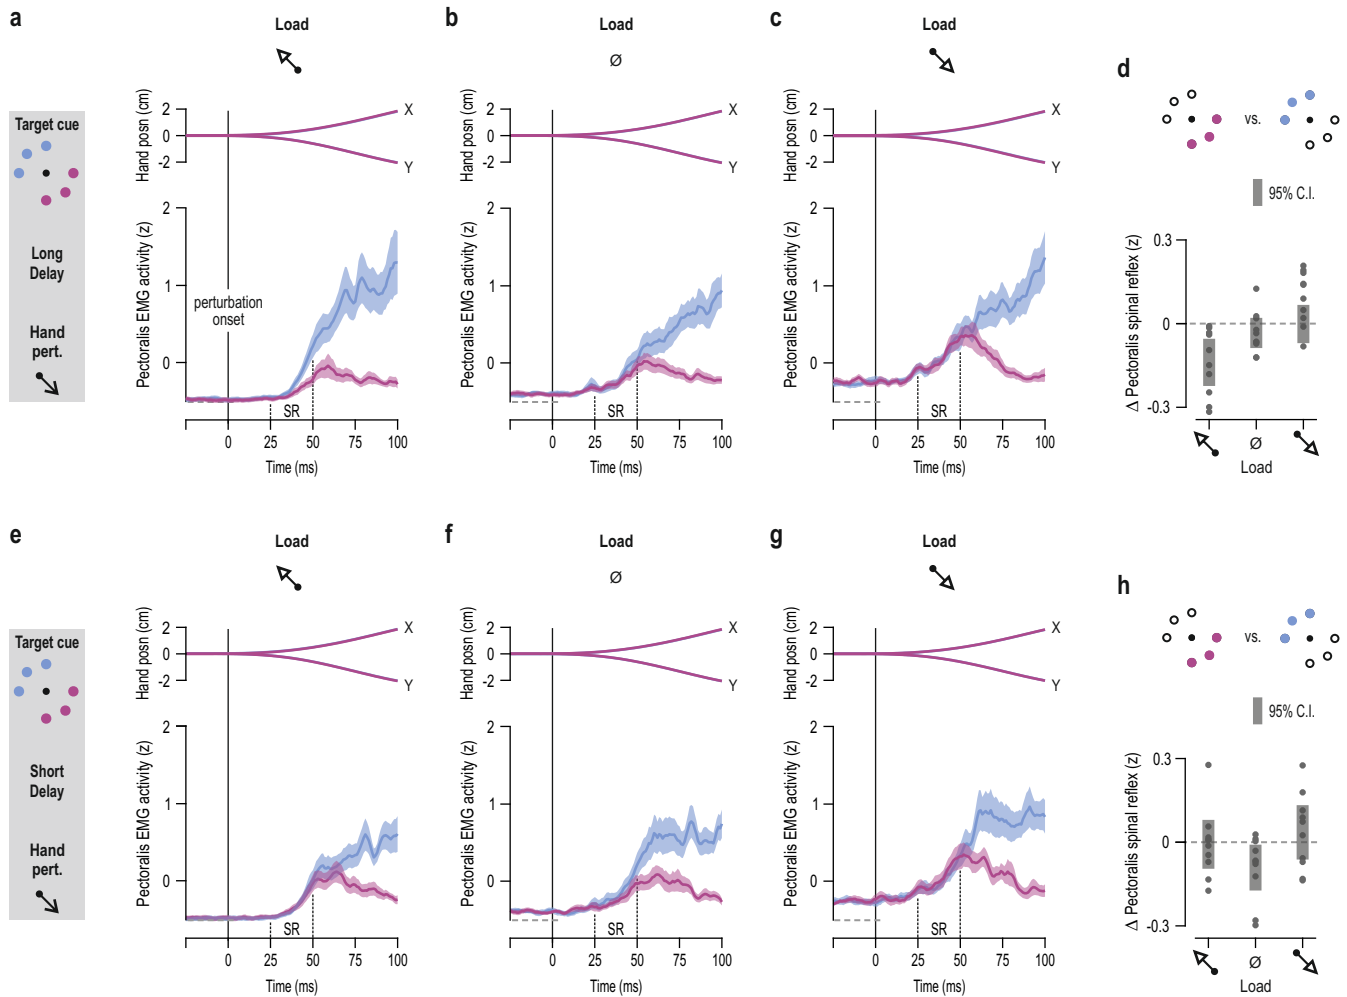

**Fig. 7: Third experiment also demonstrates goal-dependent tuning of stretch reflex gains.**

Experiment '3' was conducted as per experiment '2' (Figs. 5a-b) except in this case six targets were employed rather than two (see left schematics) and the long and short preparatory delays were 1.2 and 0.2 sec, respectively. **a-c** Mean hand position (posn.) and mean rectified pectoralis EMG activity across participants when this muscle was unloaded ('a'), when there was no external load ('b'; note increased EMG levels prior to time '0' due to co-contraction), and when the pectoralis was externally loaded ('c'). The data represent trials where the preparatory delay was relatively long and the subsequent perturbation stretched the pectoralis. SR denotes the epoch associated with the spinal stretch reflex. **d** Difference in mean pectoralis EMG activity (purple minus blue) in the spinal SR epoch, corresponding to the data shown in 'a-c'. Dots represent individual participants and thick vertical lines represent 95% confidence intervals. **e-h** As the top row of panels but representing trials where the preparatory delay was relatively short.

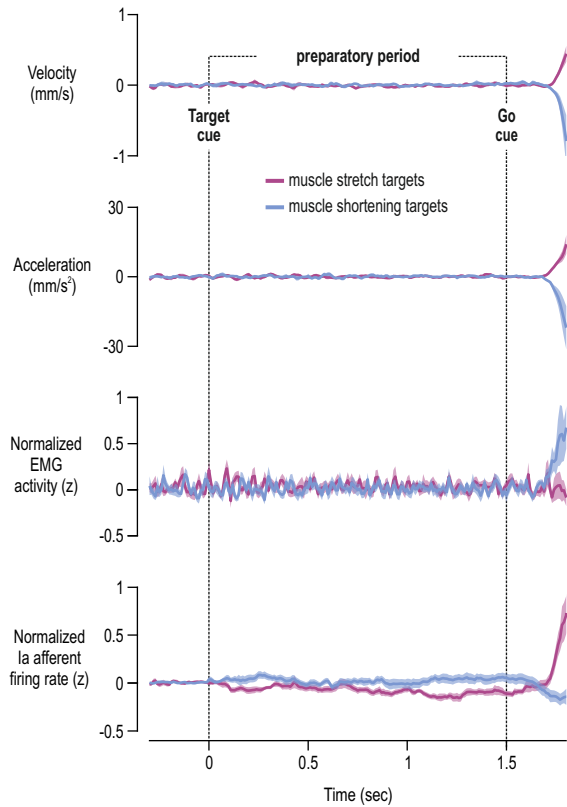

**Supplementary Figure 1: Population signals before, during and after movement preparation**

Mean stretch velocity, acceleration, EMG and spindle type Ia signals across all recorded spindle-bearing muscles. The traces are aligned to onset of the target cue (time '0') as per Figure 2b. Purple and blue traces represent targets associated with stretch and shortening of the spindle-bearing muscle, respectively. Shading represents  $\pm 1$  s.e.m. Here, signals are also shown for the short period (0.3 sec) following onset of the Go signal where reaching movement begun to occur.



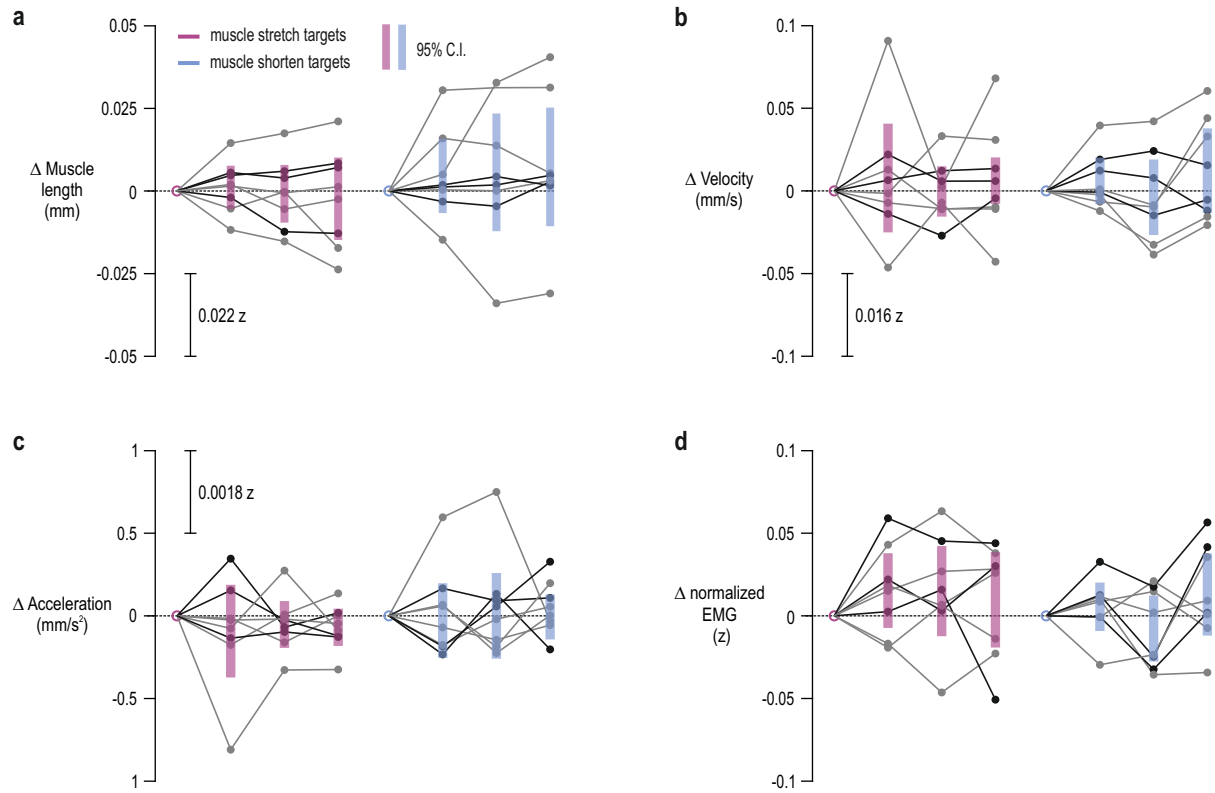

**Supplementary Fig. 2: Very small deviations in kinematic signals and variability in EMG during preparation are unrelated to spindle tuning.** a-d, Spindle-bearing muscle length, velocity, acceleration and EMG, respectively, corresponding to the afferent data presented in Figure 2c. Thin grey lines represent data from individual wrist extensor muscles and thin black lines represent data from digit extensors. The shaded bars represent 95% confidence intervals. The same color scheme is used throughout. As expected, deviations in these variables were minor and, importantly, none of the groups systematically differed from baseline, and no trends similar to those observed in Ia firing were seen (i.e., purple epoch '3' < epoch '1'; Fig. 2c). Scales of normalized values (z) are also shown, reinforcing that deviations in these variables during preparation were very small compared to the changes observed across the full duration of the delayed-reach task.

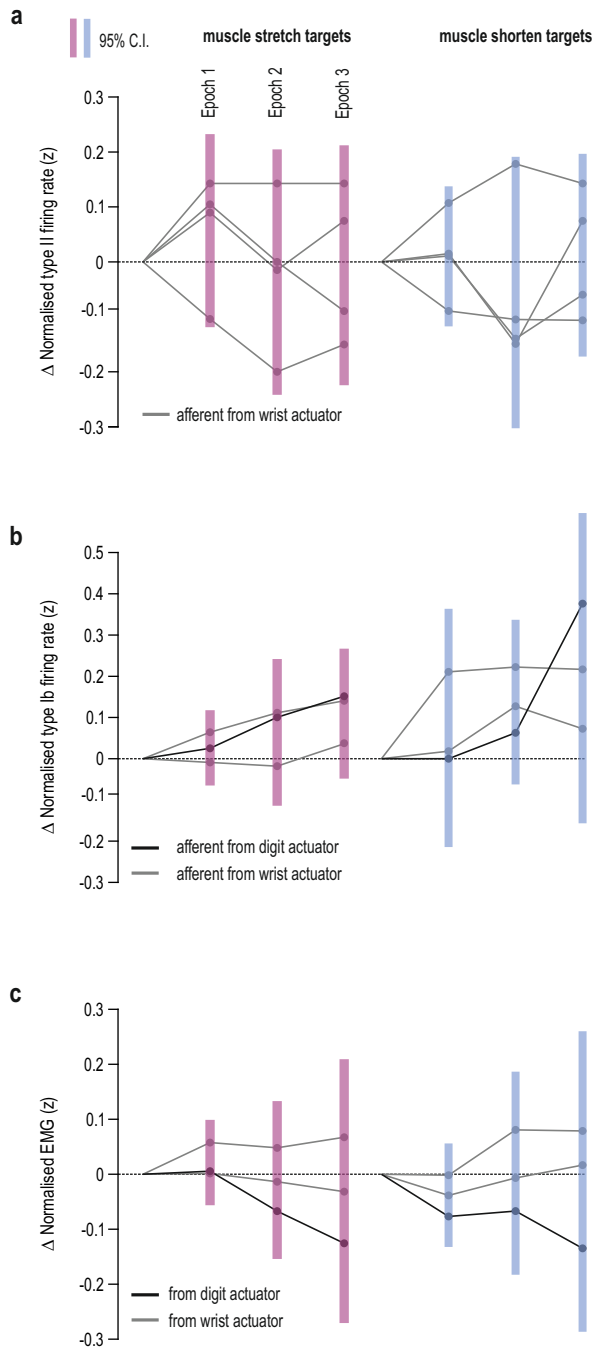

**Supplementary Figure 3: Type II and type Ib responses during movement preparation.**

**a** As Figure 2c but representing secondary muscle spindle afferents ('type II'). **b** Same format as 'a' but representing afferent activity from Golgi tendon organ afferents ('type Ib'). **c** Same format as 'b' but representing Golgi-bearing muscle EMG.

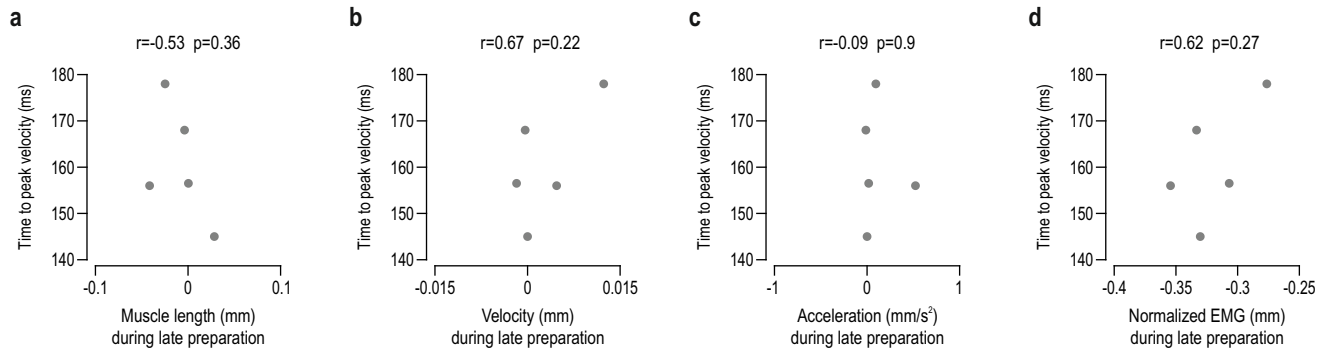

**Supplementary Figure 4: Kinematic signals and EMG at late movement preparation do not predict time to peak velocity.**

As Figure 4c but horizontal axes pertain to spindle-bearing muscle length (a), velocity (b), acceleration (c), and EMG (d). There was no significant relationship between any of these variables and time to peak velocity during reaching.

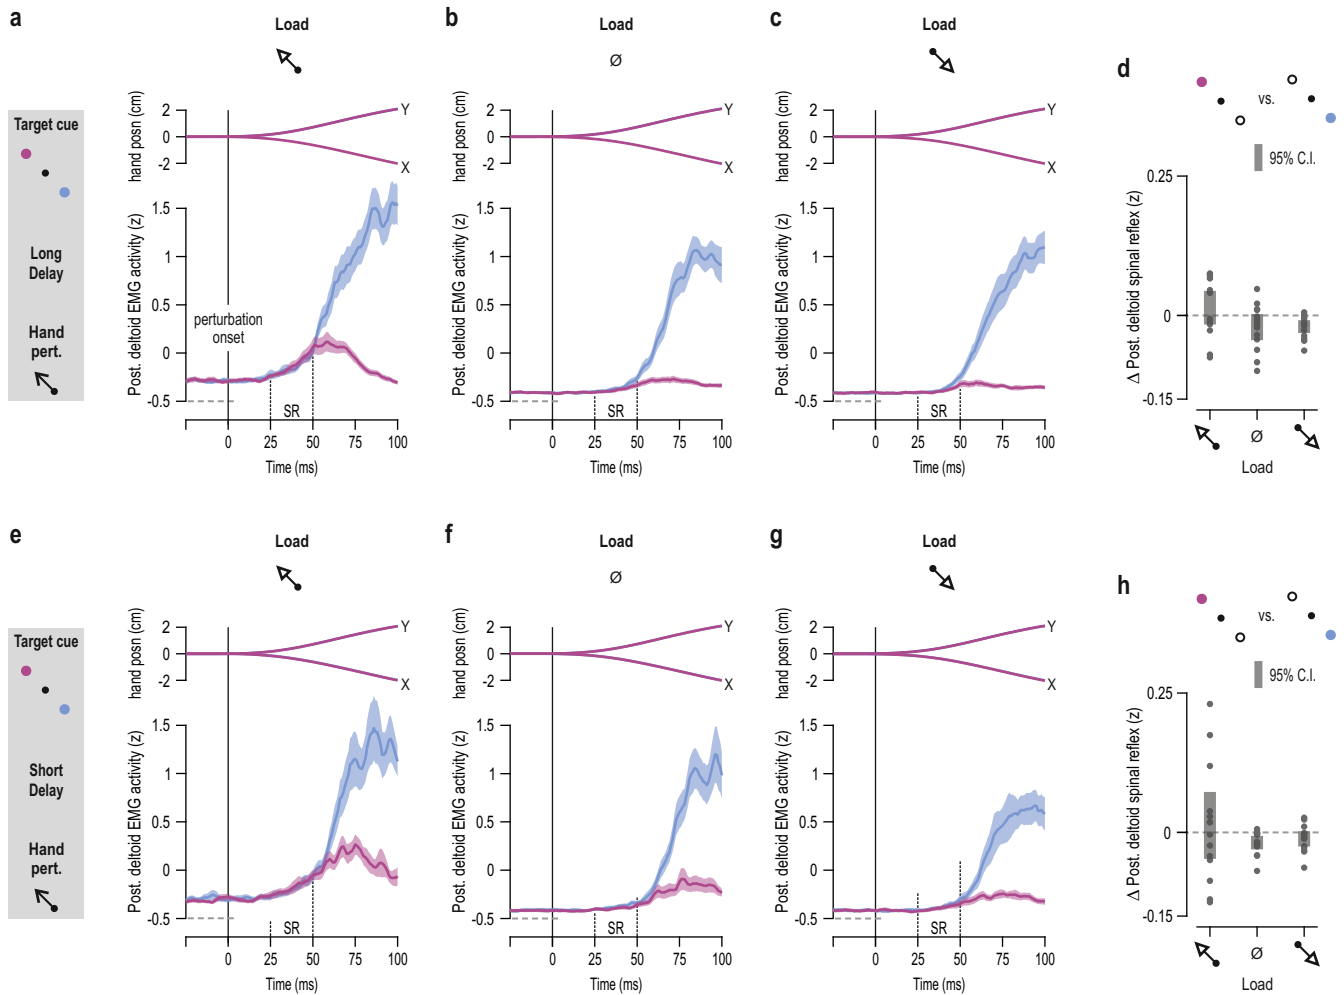

**Supplementary Figure 5: Similar goal-dependent effects on stretch reflex gain of the posterior deltoid.**

**a-c** Mean hand position (posn.) and mean rectified posterior deltoid EMG activity across participants when this muscle was externally loaded ('a'), when there was no external load ('b'), and when this muscle was unloaded ('c'). As the schematic on the far left indicates, the data here represent trials where the preparatory delay was relatively long and the subsequent perturbation stretched the posterior deltoid. SR denotes the epoch associated with the spinal stretch reflex. **d** There was a consistent pattern of posterior deltoid suppression, equivalent to that observed for the pectoralis (Fig. 6d; see also Results). **e-h** As top row of panels but representing trials where the preparatory delay was short (0.25 sec).
